1  
2  
3  
4  
5  
6  
7  
8  
9  
10  
11  
12  
13  
14  
15  
16  
17  
18  
19  
20  
21  
22

## Locating Macromolecular Assemblies in Cells by 2D Template Matching with *cis*TEM

Bronwyn A. Lucas<sup>1#</sup>, Benjamin A. Himes<sup>2#</sup>, Liang Xue<sup>3,4</sup>, Timothy Grant<sup>1†</sup>, Julia Mahamid<sup>3</sup>, Nikolaus Grigorieff<sup>2\*</sup>

<sup>1</sup> Howard Hughes Medical Institute, Janelia Research Campus, Ashburn, VA, United States

<sup>2</sup> Howard Hughes Medical Institute, RNA Therapeutics Institute, The University of Massachusetts Medical School, Worcester, MA, United States

<sup>3</sup> Structural and Computational Biology Unit, European Molecular Biology Laboratory (EMBL), Heidelberg, Germany

<sup>4</sup> Collaboration for joint PhD degree between EMBL and Heidelberg University, Faculty of Biosciences

# Equal contribution

\* For correspondence: [niko@grigorieff.org](mailto:niko@grigorieff.org)

† Present address: John W and Jeanne M Rowe Center for Research in Virology, Morgridge Institute for Research, Madison, WI, USA; Department of Biochemistry, University of Wisconsin-Madison, Madison, WI, USA

## 23 **Abstract**

24 Over the last decade, single-particle electron cryo-microscopy has become one of the main  
25 techniques contributing to the growing library of high-resolution structures of macromolecules  
26 and their assemblies. For a full understanding of molecular mechanisms, however, it is important  
27 to place them into the broader context of a cell. Traditionally, this context can be visualized in  
28 3D by electron cryo-tomography, and more recently, has also been studied by template matching  
29 of 2D images of cells and viruses. A current limitation of the latter approach is the high  
30 computational cost that limits the throughput and widespread adoption of this method. We  
31 describe here a GPU-accelerated implementation of 2D template matching in the image  
32 processing software *cisTEM* that allows for easy scaling and improves the accessibility of this  
33 approach. We apply 2D template matching to identify ribosomes in images of frozen-hydrated  
34 *Mycoplasma pneumoniae* cells and demonstrate that it can function as a versatile tool for *in situ*  
35 visual proteomics and *in situ* structure determination. We compare the results with 3D template  
36 matching of tomograms acquired on identical sample locations. We identify strengths and  
37 weaknesses of both techniques which offer complementary information about target localization  
38 and identity.

## 39 Introduction

40 A major goal in structural biology over the last 70 years has been to understand the molecular  
41 mechanisms of biological processes that occur inside cells by studying the underlying proteins  
42 and their assemblies, collectively referred to here as complexes, and the many biochemical  
43 reactions catalyzed by them. X-ray crystallography and electron microscopy, in particular  
44 electron cryo-microscopy (cryo-EM), have generated high-resolution density maps of these  
45 complexes that could be interpreted by atomic models, allowing a detailed description of  
46 molecular mechanisms (Berman et al., 2002). Of these two structural techniques, cryo-EM has  
47 emerged as the more versatile, being applicable to 2D and 3D crystals, helical assemblies, non-  
48 crystalline material (single particles), cells and tissues. All cryo-EM techniques have greatly  
49 benefited from technical advances over the last decade, including direct electron detectors with  
50 improved image quality and speed allowing for movie data collection (Brilot et al., 2012;  
51 Campbell et al., 2012; Li et al., 2013), more powerful computers, and new image processing  
52 algorithms (Lyumkis et al., 2013; Scheres, 2012), leading to the so-called “resolution revolution”  
53 (Kuhlbrandt, 2014). Using single-particle cryo-EM, it has become easier to obtain near-atomic  
54 resolution structures of a broad range of complexes, following earlier resolution breakthroughs  
55 with 2D crystals, helical assemblies, and highly symmetrical virus particles (Grigorieff &  
56 Harrison, 2011; Hasler et al., 1998; Sachse et al., 2008). A particular strength of the single  
57 particle technique, as opposed to crystallography, is its ability to sort particles according to their  
58 3D structure using image classification techniques, and to deliver structures of several distinct  
59 states of a complex observed under near-native conditions (Abeyrathne et al., 2016). This  
60 structural “deconvolution revolution” has been equally important in driving the success of cryo-  
61 EM, and often yields a more complete picture of a mechanism than can be obtained from the best  
62 resolved structure of a single state.

63 While the list of high-resolution structures is rapidly growing, a full understanding of molecular  
64 mechanisms, and of the role these complexes play within the host organism, requires the broader  
65 context of the cell (Alberts, 1998). This context is necessary to understand the functional  
66 coupling of different complexes, for example by transient interaction between them, by efficient  
67 shuttling of substrates and products, or by a common regulatory mechanism (e.g., transcription-  
68 translation coupling (O’Reilly et al., 2020), turnover of nuclear pore complexes (Allegretti et al.,  
69 2020) or co-translational protein transport (Braunger et al., 2018)). More native conditions can  
70 be maintained in a sample by employing rapid purification of cell lysate (Behrmann et al., 2015).  
71 The rapid purification aims to better preserve transient interactions and states compared with  
72 traditional purification techniques, but at the expense of purity. The “impure” sample can then be  
73 purified *in silico* by modern image classification techniques that are now commonplace in cryo-  
74 EM. To achieve close-to native conditions, cryo-EM can also be used to image molecules and  
75 complexes directly inside frozen-hydrated cells and tissue at high resolution, making it one of the  
76 most promising approaches to add cellular context to structures that have been visualized *in*  
77 *vitro*. To date, the most developed cryo-EM technique to visualize the “molecular sociology” of

78 cells (Beck & Baumeister, 2016) is electron cryo-tomography (cryo-ET) (Oikonomou & Jensen,  
79 2017).

80 Similar to single-particle cryo-EM, cryo-ET has seen significant development over the past  
81 decade (Wan & Briggs, 2016), including the extension of subtomogram averaging to sub-nm  
82 resolution (Schur et al., 2013). By adapting techniques from single-particle cryo-EM to work on  
83 small 3D volumes within a tomogram, subtomogram averaging can boost the resolution of  
84 reconstructions of complexes visualized *in situ*, thus avoiding the difficulties related to sample  
85 purification (A. Bartesaghi et al., 2008; Bohm et al., 2000; Winkler et al., 2009). Subtomogram  
86 averaging also benefits from image classification, yielding detailed 3D volumes of cells and  
87 sections that show the distribution and functional states of prominent complexes, such as  
88 ribosomes and proteasomes, in relation to compartments, membranes, filaments and other  
89 cellular structures (Asano et al., 2015; Cai et al., 2018; Mahamid et al., 2016). Subtomogram  
90 averaging and the annotation of 3D volumes requires the correct identification of density features  
91 in the tomogram, which is still one of the major bottlenecks for the method (Pfeffer & Mahamid,  
92 2018; Zhang, 2019). This can be accomplished by matching with a 3D template density  
93 (Frangakis et al., 2002), which may be obtained from a small preliminary set of manually  
94 selected subtomograms, or from a different experiment, for example single-particle cryo-EM. 3D  
95 template matching (3DTM) has been particularly successful in the study of large cytoplasmic  
96 complexes, such as ribosomes, proteasomes and chaperonins (Eibauer et al., 2012; Pfeffer et al.,  
97 2018) and even proteasomes inside the nucleus, close to nuclear pore complexes (Albert et al.,  
98 2017). However, the nucleus as a whole has proven to be more challenging, due to molecular  
99 crowding and the higher density produced by nucleic acids in cryo-EM images (Spahn et al.,  
100 2000). This points to a more fundamental problem in cryo-ET: density annotation depends  
101 critically on recognizing the overall shape, i.e., the particle envelope, which may be obscured in  
102 regions of the cell with high molecular density, or in regions where several complexes connect to  
103 form a single continuous density (Grünewald et al., 2002). 3DTM is also susceptible to false-  
104 positive detections as the limited resolution of a tomogram (~20 Å (Frank, 2006)) makes  
105 correlation coefficients relatively insensitive to internal structure.

106 Recently, we described a 2D template matching (2DTM) technique (Rickgauer et al., 2017) that  
107 may overcome some of the limitations of 3DTM. It matches projections of 3D templates to  
108 features found in single-exposure (2D) images of nominally untilted specimens. Avoiding  
109 multiple exposures and high specimen tilt angles helps preserve the high-resolution signal in  
110 these 2D images (Brilot et al., 2012), and therefore, 2DTM can utilize this signal to detect  
111 complexes with high specificity, as well as high angular and positional in-plane accuracy (x,y  
112 coordinates). This added signal comes at the expense of increased structural noise in the images  
113 due to overlapping density from other molecules in the cell, and a relatively large error in  
114 localizing the depth of the targets within the sample (z coordinate). 2DTM also requires a fine-  
115 grained angular search composed of millions of reference projections and correlation maps to be  
116 calculated, therefore making the computational workload of a 2D template search relatively high

117 compared to a more coarse-grained search that is normally done with 3DTM. We describe here  
118 an implementation of 2DTM in the software package *cis*TEM (Grant et al., 2018), providing a  
119 user-friendly graphical interface and GPU-acceleration to speed up computation. We applied  
120 2DTM to a set of images of *Mycoplasma pneumoniae* using a bacterial 50S large ribosomal  
121 subunit (LSU) as a template. *M. pneumoniae* cells are small and electron-transparent and do not  
122 require additional sample thinning (Kühner et al., 2009), for example via controlled cell lysis (Fu  
123 et al., 2014) or more commonly by using focused ion beam milling (Marko et al., 2007; Rigort et  
124 al., 2012; Strunk et al., 2012). We show that 2DTM is a versatile method with potentially broad  
125 applications for both *in situ* visual proteomics and *in situ* structure determination, including *de*  
126 *novo* structure determination. We compare the results of 2DTM and 3DTM directly by collecting  
127 a subsequent tomogram of the same area analyzed by 2DTM. We show that 2DTM has improved  
128 specificity relative to 3DTM and comparable sensitivity given a sufficiently thin sample.

129

## 130 **Results**

### 131 **GPU-accelerated 2DTM implemented in *cis*TEM**

132 The large search space required for 2DTM makes this method computationally demanding; a  
133 single 1850 x 1850 pixel image required 1000 CPU-hours for a search in the proof-of-principle  
134 MATLAB implementation (Rickgauer et al., 2017). To make 2DTM accessible to more users  
135 and a broader range of biological questions, we implemented 2DTM in *cis*TEM (Grant et al.,  
136 2018) (**Figure 1a**) using C++ and achieved a roughly 23x speed-up compared to the MATLAB  
137 implementation. The core 2DTM algorithm is unchanged from its original description as  
138 depicted in the flowchart in **Figure 1 - figure supplement 1**. The *cis*TEM implementation may  
139 be run as a standalone from the command line interface, or alternatively, using the *cis*TEM  
140 graphical user interface (GUI). In addition to a user-friendly interface, the GUI affords several  
141 advantages: Firstly, project metadata and image-specific information, such as CTF estimation,  
142 are tracked in a database; secondly, the search is easily divided over many CPUs or computers  
143 using *cis*TEM's MPI-like dispatch via run-profiles; and thirdly, the results are displayed in an  
144 interactive manner allowing for easy interpretation and comparison across multiple search  
145 conditions. A screenshot showing the results of a template matching search in the *cis*TEM GUI is  
146 shown in **Figure 1a**. The GUI displays the image searched (**Figure 1b**), maximum intensity  
147 projection (MIP) (**Figure 1c**) and the plotted results (**Figure 1d**), enabling rapid qualitative  
148 interrogation of the template matching results.

149 Even with these improvements, searching a more typically sized image, like that from a Gatan  
150 K3 detector (5760 x 4092 pixels) requires ~7,100 CPU-hours when searching 13 focal planes,  
151 which are needed to resolve overlapping densities in a 150 – 200 nm thick sample. Further  
152 substantial gains in the CPU-based code are not likely, given that about 85% of the computation  
153 for 2DTM is spent on calculating fast Fourier transforms (FFTs) using the already highly

154 optimized Intel Math-Kernel library (MKL). To circumvent these limitations, we developed a  
155 GPU image class in *cisTEM* that has a subset of the same underlying member variables and  
156 methods as the corresponding CPU image class. Both implementations use positions on the Euler  
157 sphere to divide the search space (**Figure 2a**). The GPU implementation exploits further  
158 parallelism via threading, which combined with CUDA streams allows for multiple kernels to  
159 execute on the GPU simultaneously (**Figure 2b**). This in turn allows us to create a dynamic load  
160 balancing that results in full occupancy of the GPU over a wide range of problem sizes.

161 To evaluate the performance improvements of our GPU 2DTM implementation relative to the  
162 CPU 2DTM implementation, we compared two high-end GPUs (Nvidia GV100) against two  
163 high-end 28-core CPUs (Intel Xeon Platinum 8280) installed in the same general-purpose  
164 workstation, with all other hardware and variables unchanged. By this metric, the GPU-  
165 accelerated implementation of 2DTM achieved an 8.5x speed up relative to the CPU-only  
166 implementation (**Figure 2c**). Using IEEE 754 half-precision floating point values (FP16) for the  
167 arrays used to track search statistics, namely the pixel-wise sum and sum-of-squares over all  
168 orientations, resulted in further acceleration and a reduced memory footprint. The total speed-up  
169 was 10.5x (**Figure 2c**). The algorithm scales nearly linearly with the number of GPUs used, as  
170 shown for different NVIDIA GPU architectures in **Figure 2d**. The relative computational cost of  
171 each step of the GPU-accelerated 2DTM inner loop algorithm is detailed in **Figure 2 - figure**  
172 **supplement 1**.

173 To avoid cumulative rounding errors at the reduced precision of FP16, we implemented a  
174 cascading summation where the sums and sum-of-squares are accumulated over ten search  
175 positions. Every tenth search, the results are accumulated in 32-bit single precision into a  
176 separate array. Every one-hundredth search, the results from the lower tier are accumulated, and  
177 so on, resulting in similar-sized numbers being added. An additional consideration for the sum-  
178 of-squares array was needed as the smallest positive number that can be represented by FP16  
179 without being rounded to zero is  $2^{-14}$ . To prevent these subnormal numbers from being flushed to  
180 zero, we temporarily multiply the array by a factor of  $10^3$  until conversion to higher precision  
181 farther down the cascade.

182

### 183 **Detection of 50S ribosomal subunits by 2DTM**

184 The improved speed and increased throughput of 2DTM enabled us to perform an initial screen  
185 of template and search parameters that affect target detection *in situ*. To this end, we collected  
186 2D images of plunge-frozen *M. pneumoniae*. *M. pneumoniae* lacks a cell wall and can be less  
187 than 200 nm thick, making it sufficiently thin to allow TEM imaging of whole cells in ice  
188 without the need for thinning (Kühner et al., 2009). We performed 2DTM using the *M.*  
189 *pneumoniae* 50S (PDB: in progress; EMDB: 11999) (Tegunov et al., 2021) as a template (**Figure**

190 **3a)** and identified 6,558 50S large ribosomal subunits in 220 2D images. This search did not  
191 distinguish between isolated subunits and subunits bound to the 30S small ribosomal subunit.

192 The output from a 2DTM search are SNR values that depend on both the agreement between the  
193 template and the target as well as noise in the image (Sigworth, 2004). The noise is  
194 predominantly shot noise, as well as background generated by molecules and other cellular  
195 material overlapping the target in projection. A target is detected when the SNR value exceeds a  
196 threshold at which the average number of false positives per search is set to a user-specified  
197 number, usually one (Rickgauer et al., 2017). To improve the match between template and  
198 recorded signal, the template can be low-pass filtered to approximate physical blurring of the  
199 image due to radiation damage and beam-induced motion, as well as discrepancies between the  
200 target in the template, for example due to conformational differences. To low-pass filter the  
201 template, we applied a range of B-factors to the initial map generated using *pdb2mrc* ((Tang et  
202 al., 2007), see Methods) and found that the average SNR was maximized using a B-factor of  
203 about  $85 \text{ \AA}^2$  (**Figure 3 - figure supplement 1a**). Using this value, we found that searching an  
204 image composed of exposure-weighted frames ( $32 \text{ e}^-/\text{\AA}^2$ ) (Grant & Grigorieff, 2015) increased  
205 the average SNR compared to using only the first 8 frames ( $12.8 \text{ e}^-/\text{\AA}^2$ ) with or without exposure  
206 weighting (**Figure 3 - figure supplement 1b**). We conclude that including additional frames  
207 with exposure weighting does not diminish the 2DTM SNR, indicating the constructive  
208 contribution of lower-resolution features to the detected signal. Consistent with SNR values  
209 being sensitive to defocus errors (Rickgauer et al., 2017, 2020), searching each image with  
210 templates sampling a defocus range of  $2400 \text{ \AA}$  in  $200 \text{ \AA}$  steps (13 defocus planes) increased the  
211 number of detected targets by  $\sim 40\%$  in a  $100 \text{ nm}$  thick sample and  $\sim 400\%$  in a  $220 \text{ nm}$  thick  
212 sample (**Figure 3 - figure supplement 1c**). In addition to increasing the number of detected  
213 targets, the defocus search also provides a rough estimate of the out-of-plane position of each  
214 50S. Earlier simulations predicted that protein background would result in reduced target  
215 detection in images collected at higher defocus (Rickgauer et al., 2017). In the present  
216 experiment, we did not observe a consistent relationship between mean SNR and image defocus  
217 over the range of  $\sim 500$  to  $\sim 2200 \text{ nm}$  underfocus (**Figure 3 - figure supplement 1d**), suggesting  
218 that detection of complexes as large as 50S ribosomal subunits is not prevented by collecting  
219 images further from focus.

220

### 221 ***De novo* structure determination using 2DTM**

222 In our current 2DTM implementation, each detected target is assigned an x,y location, three  
223 Euler angles and a defocus value (z coordinate) (**Figure 3a**). These parameters can be used to  
224 calculate a 3D reconstruction using standard single-particle methods. It is well known that a  
225 reconstruction calculated from particles that were identified using a template may suffer from  
226 significant template bias (Henderson, 2013), reproducing only features of the template and not

227 the targets. However, as shown by Rickgauer et al. (2017) and discussed below, applying an  
228 absolute (rather than relative) threshold based on a known noise distribution, also limits template  
229 bias and new features not present in the template may be visible in a reconstruction derived from  
230 detected targets. To test this, we calculated a reconstruction using the results from searching 220  
231 images of *M. pneumoniae* cells (see above), selecting targets only from the best images that had  
232 more than nine detected targets and at least one target with an SNR value above 9. Using the  
233 5,080 targets that met these criteria, out of the total of 6,558 detected targets, we calculated a 3D  
234 reconstruction (**Figure 3b**). The 20 Å-filtered reconstruction reproduces the 50S template as  
235 expected, but also shows clear, albeit weaker density for the 30S subunit that was not present in  
236 the template, and thus cannot be due to template bias (**Figure 3b,c**).

237 The difference map calculated using *diffmap* (Grigorieff, 2021b), between the *M. pneumoniae*  
238 50S template and the 3D reconstruction shows density in regions of the 50S that have been  
239 shown to be flexible from *in vitro* reconstructions of the ribosome, specifically, around the L1  
240 stalk and the L7/L12 stalk (**Figure 3c**). The *Escherichia coli* L1 stalk moves ~45 – 60Å relative  
241 to 50S during translocation (reviewed in (Ling & Ermolenko, 2016)), and the C-terminal domain  
242 of L10 and N-terminal domain of L12 are known to be flexible (Diaconu et al., 2005). Moreover,  
243 we observed density in each of the three tRNA binding sites on the small subunit, which were  
244 not present in the template (**Figure 3d**). The density is consistent with tRNAs representing  
245 multiple sates and may also reflect the binding of other factors, such as translational GTPases in  
246 the A-site. It is therefore likely that the calculated reconstruction represents an average of  
247 different conformations adopted by the ribosome *in vivo*, as expected in actively growing cells.  
248 This average differs therefore from the single conformation used for the template, giving rise to  
249 the features observed in the difference map. Smaller features in the difference map may also  
250 correspond to noise in the reconstruction, as well as features that result from inaccuracies in the  
251 resolution scaling of the template against the reconstruction before subtraction. More accurate  
252 scaling may be achieved by scaling according to local resolution estimates, which were not  
253 obtained here, as well as masking to exclude parts in both maps that do not overlap.

254

## 255 **2DTM reveals species-specific structural features**

256 To test the specificity of 2DTM and to evaluate whether species-specific structural differences  
257 would preclude detection by 2DTM, we searched the same 220 images of *M. pneumoniae* with a  
258 50S template derived from *Bacillus subtilis* (PDB: 3J9W). *B. subtilis* 50S is structurally closely  
259 related to *M. pneumoniae* 50S but displays differences in rRNA sequence and protein  
260 composition (Grosjean et al., 2014; Sohmen et al., 2015) (**Figure 4a**). Comparing the two  
261 models by Fourier shell correlation (FSC) and taking 0.5 as a similarity threshold (**Figure 4 -**  
262 **figure supplement 1a**) suggests that the effective resolution of the *B. subtilis* template is limited  
263 to ~4.7Å. Using *B. subtilis* 50S as a template, we identified 2,874 50S locations, less than half



264 that were identified using *M. pneumoniae* template (**Figure 4b**), and with significantly lower  
265 2DTM SNR values ( $P < 0.0001$ , Mann-Whitney U test, **Figure 4c**). Again, to limit targets to the  
266 best images, we included only images that had more than two detected targets and at least one  
267 target with an SNR value above 9. Using the 1,172 targets from these images, we calculated a 3D  
268 reconstruction (**Figure 4d**). As before, the 20 Å-filtered reconstruction reproduces the 50S  
269 template with clear density for the 30S subunit and shows features consistent with translating  
270 ribosomes (**Figure 4d-e**). However, unlike before, the 3D reconstruction also shows extensive  
271 differences in the 50S relative to the *B. subtilis* 50S template (**Figure 4e**). Since this  
272 reconstruction was generated using ~5 fold fewer particles, some of the additional density likely  
273 reflects an expected higher level of noise. Despite this, further examination of the 3D  
274 reconstruction revealed that some of the features visible in the 50S density that deviate from the  
275 *B. subtilis* template likely result from *M. pneumoniae* specific features (O'Reilly et al., 2020)  
276 (**Figure 4e, Figure 4 - figure supplement 1c**). Specifically, the 3D reconstruction showed  
277 density consistent with *M. pneumoniae* specific C-terminal extensions of protein L29, and L22  
278 and protein L9 (**Figure 4f, Figure 4 - figure supplement 1c**) (O'Reilly et al., 2020). The latter  
279 was absent from the *B. subtilis* model despite being encoded in the *B. subtilis* genome (Sohmen  
280 et al., 2015). The 3D reconstruction also lacked density for protein uL30, which is present in the  
281 *B. subtilis* template, but absent from the *M. pneumoniae* genome (Grosjean et al., 2014) (**Figure**  
282 **4g**). Moreover, the 3D reconstruction shared additional unattributed features with the previously  
283 determined reconstruction (**Figure 3b**) that do not derive from either template (**Figure 4 - figure**  
284 **supplement 1c**). We conclude that a *B. subtilis* 50S template can be used as a homology model  
285 to identify *M. pneumoniae* ribosomes and distinguish species-specific features, and that  
286 including high-resolution signal in 2DTM does not overly bias the 3D reconstruction when a  
287 high SNR threshold is used. These results further demonstrate the reliability of the 2DTM and its  
288 potential to directly resolve complex structure *in situ*.

289

## 290 **Detection of 50S ribosomal subunits by 3DTM**

291 Cryo-ET combined with 3DTM is currently one of the most commonly used approaches for  
292 locating molecules within cells using available structural information. Rather than using high-  
293 resolution templates to search 2D images, as is done in 2DTM, 3DTM locates molecules in  
294 tomograms using templates filtered to 30 Å or lower (Himes & Zhang, 2018). To compare the  
295 detection of 50S ribosomal subunits by 2DTM and 3DTM, we collected 19 2D images of *M.*  
296 *pneumoniae* cells followed by tomograms of an overlapping area. These tomograms were  
297 collected after the 32 e<sup>-</sup>/Å<sup>2</sup> exposure for images used with 2DTM, using standard protocols  
298 (**Figure 5a**). The pre-exposure of 32 e<sup>-</sup>/Å<sup>2</sup> affects the signal in the tomograms at higher  
299 resolution but is expected to have only a small effect in the resolution range relevant for 3DTM,  
300 i.e., 20 Å and lower (Grant & Grigorieff, 2015). To identify 50S subunits with 3DTM, we  
301 followed established protocols using PyTOM and a 30 Å low-pass filtered 50S template

302 generated in a previous study (O'Reilly et al., 2020). The found targets were ranked according to  
303 their cross-correlation score and the top 600 hits were selected for each tomogram, followed by  
304 alignment and 3D classification with *RELION 3.0.8* (Zivanov et al., 2018). The selection of the  
305 top 600 hits ensured that more than 90% of potential targets in one tomogram, including free 50S  
306 and 50S in assembled 70S, were included. Combining *RELION* classification results with cross-  
307 correlation ranking (**Figure 5 - figure supplement 1**) shows that the hits with the lowest scores  
308 contained fewer than 10% of 50S and 70S targets.

309 We aligned the coordinates of the 652 50S subunits identified by 2DTM with 983 50S subunits  
310 identified by 3DTM (see Methods), both containing 50S targets corresponding to single 50S  
311 subunits and 70S ribosomes (**Figure 5b**). Within the area common to the 2D images and  
312 tomograms, we identified 576 2DTM targets that were within a 100-Å distance in the x,y plane,  
313 and within 20° in each Euler angle of a 3DTM target. These limits included ~95% of all paired  
314 targets (**Figure 5c-d**). The paired targets represent ~90% of all 2DTM targets and ~60% of all  
315 3DTM targets in this area (**Figure 5c**, upper). We found that the proportion of 2DTM targets  
316 with a corresponding 3DTM target was consistent across the images examined (**Figure 5d**). In  
317 contrast, the proportion of the 3DTM targets detected in the 2DTM search was variable and  
318 showed a negative correlation with sample thickness (**Figure 5e**). This is consistent with our and  
319 prior observations that 2DTM is particularly sensitive to sample thickness (**Figure 5 - figure**  
320 **supplement 2**) (Rickgauer et al., 2017, 2020), which likely contributes to the high false negative  
321 rate of 2DTM relative to 3DTM.

322 The number of targets detected in 2DTM depends on the SNR threshold, which is determined by  
323 the desired false-positive rate. Assuming a Gaussian noise distribution, we calculated a threshold  
324 SNR of 7.61 to allow for a false positive rate of one per image (Rickgauer et al., 2017). To test if  
325 a lower SNR threshold improves the agreement between 2DTM and 3DTM, we determined the  
326 proportion of detected 2DTM 50S targets with a matched 3DTM target at different SNR  
327 thresholds (**Figure 5f**). Decreasing the SNR threshold to 7.00 increases the number of detected  
328 targets >2-fold (from 652 to 1442), but the number of 2DTM targets with a corresponding  
329 3DTM target increased only ~1.2-fold (from 576 to 714) (**Figure 5c**, lower). The plot of  
330 matching targets in **Figure 5f** shows that at SNR thresholds >7.6, the proportion of 2DTM /  
331 3DTM paired targets was ~90-100%, while lowering the SNR threshold below 7.6 resulted in a  
332 sharp decrease, indicating that below this threshold, more non-matching targets were found than  
333 matching targets. The value of 7.6 agrees closely with the 7.61 threshold at which one false  
334 positive per image is expected (**Figure 5f**, dashed line). We conclude that while lowering the  
335 SNR threshold below this value increases the number of true targets identified by 2DTM, based  
336 on validation by matching 3DTM targets (**Figure 5c**, lower), the lower threshold also introduces  
337 more non-matching targets, many of them likely false positives. This experimentally validates  
338 our use of a Gaussian noise model and the Neyman-Pearson threshold criterion and shows that  
339 the SNR threshold can be used to set a desired false positive rate suitable for a particular  
340 experimental design.

341 At a threshold of 7.61, the number of 2DTM targets not detected in the 3DTM search was 76, >4  
342 times higher than the expected 19 false positives for the 19 searched images and representing  
343 ~12% of the 2DTM peaks (**Figure 5g**). This is consistent with the estimated 3DTM false  
344 negative rate of ~10% (**Figure 5 - figure supplement 1**), and suggests that these may represent  
345 false negatives in the 3DTM search. We also noted that in samples of ~100 nm we detected  
346 ~90% of the 50S identified with 3DTM (**Figure 5e**). We therefore estimate that given optimum  
347 sample parameters, 2DTM can detect 50S subunits with comparable sensitivity to 3DTM.

348

### 349 **2DTM can validate targets identified by 3DTM**

350 While 2DTM tends to miss targets close to the chosen SNR threshold, one of the key limitations  
351 of 3DTM is a high false discovery rate and the difficulty in discriminating between true and false  
352 positives. This shortcoming can be partially mitigated by manually curating the detected 3DTM  
353 targets and subsequent classification of the subtomograms. The manual curation requires  
354 experience, is time-consuming and generally not reproducible. Progress has been made to  
355 improve the discrimination between true and false positives using deep learning algorithms as  
356 demonstrated with synthetic data (Gubins et al., 2019) although on real data they currently  
357 perform only as well as 3DTM (Moebel et al., 2020).

358 We investigated the use of 2DTM as an independent screen to validate 3DTM targets, by  
359 comparing the list of detected 3DTM targets before manual curation and 3D classification with  
360 the list of high-confidence 2DTM targets. We found that 2DTM detects ~60% of the 3DTM  
361 targets that are classified as 50S or 70S, while only detecting <5% of the 3DTM targets that  
362 likely represent false positives (**Figure 6a**). Thus 2DTM can clearly discriminate targets that  
363 were excluded by classification of 3DTM targets with *RELION* (Bharat & Scheres, 2016). This  
364 shows that 2DTM provides complementary evidence that can be used to reduce the rate of false  
365 positives of 3DTM.

366 To evaluate whether we could locate 30S subunits associated with 50S by template matching,  
367 and to compare the results to the *RELION* classification of the 3DTM results, we used the  
368 locations and orientations of the 50S targets detected with the *M. pneumoniae* template to  
369 perform a local search for the 30S subunit (see Methods), sampling a range of +/- 12.5 degrees,  
370 i.e., larger than the rotational range of the 30S relative to the 50S. Of the 700 50S locations  
371 searched, 314 (~45%) had detectable 30S (**Figure 6b**), fewer than the ~70% of the 3DTM targets  
372 that were classified as 70S using *RELION*. We speculate that this is due to structural  
373 discrepancies that likely exist between the 30S template and specific instances of the small  
374 ribosomal subunit in our images. 30S is known to undergo significant conformational changes  
375 during the functional cycle of the ribosome in addition to inter-subunit rotation (see Discussion).

376 We also compared the x,y locations (**Figure 6c**), z coordinates (**Figure 6e**) and orientations  
377 (**Figure 6d**) assigned by 2DTM to those assigned by 3DTM. Comparing the 2DTM results with  
378 the refined 3DTM results shows that ~95% (576/603) of the targets aligned in x and y had an  
379 angular distance of 20° or smaller, with a median of 7° (using Eq. (1)) (**Figure 6d**). The median  
380 in-plane distance of 12 Å is likely due to deformation of the sample under the electron beam,  
381 which is more pronounced with the higher electron dose used in tilt series, and to a lesser extent  
382 due to the lower resolution of 3DTM. In contrast to the x,y locations, which were calculated in  
383 steps of one pixel (1.27 Å), the defocus values of 2DTM were sampled in 200 Å steps and,  
384 correspondingly the median out-of-plane distance between detected 2DTM and 3DTM targets  
385 was much higher at +/- 84 Å (**Figure 6e**). We used the program *refine\_template* (see Methods) to  
386 perform a local defocus refinement, which reduced the median out-of-plane distance to +/- 59 Å  
387 (**Figure 6e**), less than 1/3 the diameter of the 50S. The 5-fold greater error in z relative to the x,y  
388 plane is consistent with the previously reported weaker dependence of the 2DTM SNR values on  
389 defocus (Rickgauer et al., 2017).

390 We note that some of the 50S subunits detected by 2DTM overlap in the image and were found  
391 in comparable locations by 3DTM (e.g., **Figure 6f-i**). This confirms that 2DTM, as previously  
392 proposed (Rickgauer et al., 2017) can effectively detect overlapping particles without sample tilt.

393

## 394 **Discussion**

395 In this study, we provide strategies to overcome some of the major limitations of molecular  
396 localization in cells using 2DTM. Firstly, we present a new implementation of 2DTM in  
397 *cis*TEM, which offers a user-friendly interface and substantial acceleration by running the most  
398 demanding computations on GPUs. Secondly, we show that averaging of complexes identified  
399 with 2DTM can reveal differences between the template and the target and allow identification  
400 of interacting complexes that may be difficult to detect alone. Thirdly, we demonstrate that  
401 2DTM detects *bona-fide* ribosomes in *M. pneumoniae* cells with high specificity and comparable  
402 sensitivity relative to 3DTM. In the following, we highlight some of the technical advances of  
403 our implementation, discuss applications of, and possible improvements to 2DTM and how  
404 2DTM and 3DTM can benefit from each other.

405

### 406 **GPU acceleration increases the throughput of 2DTM**

407 To make 2DTM useful in practice, we have increased its speed by ~10-fold relative to our C++  
408 CPU implementation in *cis*TEM via GPU acceleration, making it possible to search multiple  
409 images in hours instead of days. Flexible load balancing via CUDA streams, accessible to the  
410 user by adding threads in their *cis*TEM run profile, ensure a simple mechanism to take full

411 advantage of computers containing variable Nvidia GPU hardware architectures and adapt to  
412 different problem sizes.

413 GPUs have so many processing units (cores) that efficient algorithms, like the FFT, are often  
414 limited by memory transfers. We have ameliorated this problem by taking advantage of the FP16  
415 format, storing two variables in the low and high 16 bits of a 32 bit `__half2` vector data type,  
416 thereby roughly doubling the memory bandwidth. Due to the low SNR intrinsic to cryo-EM data,  
417 the loss of numeric precision associated with FP16 does not substantially alter the effective SNR  
418 of the data stored in FP16 format. We expect that this could be useful for computation in other  
419 modalities of cryo-EM.

420 With a few precautions, we can retain sufficient precision, i.e., greater than what is used for our  
421 detection threshold, to obtain the same net results as with the 64-bit double precision  
422 accumulators used in the CPU code. We have also taken advantage of increased memory  
423 bandwidth of FP16 by converting the FFT of the input image, which is only transformed once at  
424 the outset of the algorithm, into FP16 format. When this array is read into the GPU's streaming  
425 multi-processors for cross-correlation, it is converted to 32-bit single precision as part of our  
426 `cuFFT` callback routine prior to the conjugate multiplication and inverse FFT. Due to the limited  
427 range of FP16, we did not investigate whether this reduced precision could be used directly in  
428 the FFT in 2DTM. In principle, this could yield another ~1.6x speedup by doubling the inverse  
429 FFT computation speed. Additionally, it may be possible to exploit the fact that each template is  
430 padded with zeros to the full image size prior to taking the FFT, resulting in many redundant  
431 zero-valued 1D FFTs in the common row-column transform approach for 2D FFTs.

432 Support for the new `Bfloat16`, which has a larger range than FP16, and hardware acceleration for  
433 asynchronous memory movement on chip in the new Nvidia Ampere architecture, may also  
434 provide additional opportunities to accelerate the current algorithm, which is predominantly  
435 memory-bandwidth limited. Finally, further acceleration may be gained by improving the  
436 algorithm itself, perhaps via a hierarchical search as is done in single-particle cryo-EM. For  
437 example, a coarse search followed by a local refinement may improve both the speed and overall  
438 accuracy of 2DTM.

439

#### 440 **Template matching and noise overfitting**

441 Template matching is a well-established method to pick particles in single-particle cryo-EM  
442 images for further processing and 3D reconstruction (Scheres, 2015; Sigworth et al., 2010). The  
443 advantage of using a template that matches the structure of the particle to be reconstructed is  
444 more discriminatory picking, and the possibility to exclude contaminants and other features in an  
445 image that do not represent valid particles. Using a template for picking can also lead to template  
446 bias, i.e., a 3D reconstruction that reproduces the template rather than the true particle structure

447 (Henderson, 2013; Subramaniam, 2013; Van Heel, 2013). It is therefore important to validate  
448 features in a reconstruction derived from particles identified by template matching. This is  
449 commonly done by observing features in the reconstruction that were not present in the template,  
450 and that are known to be true. For example, templates can be low-pass filtered to 20 Å or lower  
451 (Scheres & Chen, 2012), and the emergence of high-resolution features such as secondary  
452 structure or amino acid side chains will then validate the reconstruction. In the current release of  
453 *cis*TEM (Grant et al., 2018), a Gaussian blob is used for particle picking, and recognizable low  
454 and high-resolution features visible in the reconstruction serve as validation. Since 2DTM uses  
455 high-resolution features to identify targets, reconstructions have to be validated differently, for  
456 example by identifying additional *a priori*-known density features that were not present in the  
457 template. In the case of using the 50S templates for 2DTM, the reconstructions showed clear  
458 density for the 30S subunit, as well as at tRNA binding sites, both of which validate the  
459 reconstructions (**Figure 3c-d**). However, despite this validation, there may still be a template  
460 bias in the reconstruction (Stewart & Grigorieff, 2004). While it is not possible to quantify this  
461 bias without knowledge of the unbiased reconstruction, the strength of the bias will depend on  
462 the degrees of freedom accessible during template matching, i.e., the number of search locations.  
463 By increasing the SNR threshold to a value where only one false positive per search is expected  
464 on average, almost all search locations that do not contain matching signal are excluded. The  
465 high SNR threshold used in our 50S template search, therefore, limits the template bias in the  
466 reconstruction. Indeed, apart from the large additional density corresponding to the 30S subunit,  
467 there are also several smaller differences between the template and the reconstruction within the  
468 region of the 50S subunit that can be related to conformational changes occurring during  
469 translation (**Figure 3c-d**, see Results). This confirms that template bias in this reconstruction  
470 must be small relative to the unbiased signal represented by the reconstruction.

471

## 472 **Template optimization**

473 To realize an approach that combines 2DTM and 3DTM, a better understanding of how  
474 resolution affects 2D and 3D template searches will be needed. In this study, we found that  
475 applying a B-factor of 85 Å<sup>2</sup> to the 50S template maximized the mean detection SNR in this  
476 dataset (**Figure 3 - figure supplement 1a**). This value matches closely the B-factor of 86 Å<sup>2</sup>  
477 used to correct the *in situ* reconstruction of the *M. pneumoniae* 70S from subtomograms  
478 (Tegunov et al., 2021). Since this B-factor affects all atoms in the template equally, we expect  
479 that a more accurate method of generating templates that uses variable B-factors to account for  
480 local differences in mobility will further improve detection. We propose that given a sufficiently  
481 accurate method to calculate template densities, 2DTM could be used to investigate the relative  
482 impact of these and other, not yet considered, factors. For example, we could use biochemical  
483 restraints to control conformational/compositional heterogeneity and thereby investigate the  
484 process of radiation damage which likely varies based on a complex's chemical composition and

485 environment. Alternatively, if we can correctly model sample motion and radiation damage, we  
486 could use 2DTM to probe for more detailed aspects of an individual target's structural identity  
487 and composition, which may vary based on location in the cell or lifecycle of the organism to be  
488 investigated. It will therefore be important in the further development of 2DTM to also develop  
489 more reliable and accurate methods to generate templates from atomic coordinates, and to  
490 comprehensively model cryo-EM images.

491 Templates in the present study used density maps generated by *pdb2mrc* (Tang et al., 2007), and  
492 projections were calculated using the simple linear interpolation algorithms implemented in  
493 *cisTEM* (Grant et al., 2018). These simplifications contributed to the acceleration of our 2DTM  
494 implementation, compared to the more accurate density modeling and projection calculation used  
495 previously (Rickgauer et al., 2017 & 2020). The simplifications, as well as deformation of the *M.*  
496 *pneumoniae* cells under the electron beam (Tegunov et al., 2021), leading to noticeable blurring  
497 in some of our images, likely affect the SNR values obtained in our template searches. Indeed,  
498 the SNR values we observe are lower on average than expected based on the molecular mass of  
499 our template (about 1.2 MDa), as well as previously observed values obtained with different  
500 samples and template structures (Rickgauer et al., 2017 & 2020). Furthermore, the *M.*  
501 *pneumoniae* 50S atomic model built into a 3.5-Å map (Tegunov et al., 2021) may contain atomic  
502 coordinate errors that are larger than those in the 60S and 40S models used by Rickgauer et al.  
503 (2020), which were built into 2.9-Å maps. Coordinate errors will further decrease the SNR  
504 values obtained in a template search. Accurate atomic models and methods to simulate realistic  
505 cryo-EM images (Himes & Grigorieff, 2021) will therefore be important to maximize the  
506 detectability of molecules by 2DTM.

507

## 508 **2DTM with multiple templates**

509 2DTM employs the matched filter, which is the statistically optimal detector for a deterministic  
510 signal in wide-sense stationary noise (McDonough, 1995). With zero-mean Gaussian noise, the  
511 output of the matched filter is an SNR determined by the ratio of the cross-correlation coefficient  
512 to the standard deviation of the noise in an image. Given that the noise is roughly constant for a  
513 given image, the SNR measured in 2DTM is ultimately limited by the template's molecular  
514 mass, making smaller complexes more difficult to detect. In our earlier work, we limited the  
515 SNR threshold to a value allowing, on average, one false positive per search. This threshold is  
516 clearly not optimal for every experiment and should be adjusted based on the experimental  
517 rationale and design.

518 A match in 2DTM indicates that the template is sufficiently similar to the target to yield an SNR  
519 above the significance threshold, but does not indicate that the target conforms to the exact  
520 structure of the template. Indeed, significant peaks were detected using the *B. subtilis* 50S as a  
521 template which has substantial differences to the *M. pneumoniae* 50S (discussed below). Since

522 target detection depends on pre-existing structures, detection by 2DTM is necessarily biased  
523 towards targets that are sufficiently similar to the state represented by the template, and other  
524 states may be missed. As a consequence, targets detected with 2DTM likely reflect a subset of  
525 the total complement of *in vivo* states. To reduce bias, variable regions could be removed from  
526 the template, thereby also reducing the potentially detectable signal in a template search. To  
527 detect targets that are in different states without loss of signal, multiple templates representing  
528 different states might be used. The problem of mismatched states is particularly evident when  
529 performing a local search for bound 30S subunits using the coordinates of detected 50S subunits.  
530 Despite the 30S subunits being well within the size range expected to be detectable by 2DTM in  
531 images of samples with a thickness of 150 – 200 nm (Rickgauer et al., 2017), we found only  
532 ~45% of the identified 50S bound with 30S subunits, just over half of the expected 70% based on  
533 the analysis of tomograms from *M. pneumonia* ((O'Reilly et al., 2020), **Figure 6b**). It is unlikely  
534 that this low detection rate is due to a bias of 2DTM towards detecting isolated 50S subunits  
535 because (i) a 3D reconstruction based on detected 50S subunits shows clear density for the 30S  
536 subunit (**Figure 3d**) and (ii) there was no significant difference in the detection of 50S and 70S  
537 targets, as validated by 3DTM (**Figure 6 - figure supplement 1**). Since the 30S subunit is highly  
538 dynamic and can adopt multiple conformations, it is likely that our false negatives arose from  
539 conformations that are not sufficiently similar to the 30S template that we used in our search.

540 Below an SNR of 7.2, the number of detected 2DTM targets without a 3DTM match is less than  
541 statistically expected (**Figure 5g**). This suggests that the statistics, which are based on a Gaussian  
542 noise model, might suffer from bias, for example because the correlation coefficients calculated  
543 for each search location are not completely independent from each other. While further  
544 investigation will be needed to model the noise in correlation maps more accurately, the current  
545 bias due to residual correlations between search locations results in a slight overestimation of the  
546 number of false positives at a given SNR. Incorporating more accurate noise models, and  
547 properly accounting for uncertainty in the model (reference structure) will require the  
548 replacement of the SNR values currently used to evaluate 2DTM results by a more general  
549 probabilistic framework. The use of likelihood ratios, for example, will make 2DTM more  
550 robust, as well as open up new avenues to explore molecular heterogeneity.

551

## 552 **2DTM as a tool to investigate diverse species**

553 One of the limitations of 2DTM is a reliance on pre-existing high-resolution structures. Outside  
554 of a few model organisms, high-resolution structures are not available for the vast majority of  
555 species. We show that, despite differences in their structures, a *B. subtilis* 50S template can  
556 detect 50S in *M. pneumoniae* cells (**Figure 4**). Thus, it is possible to use structures from related  
557 organisms to identify the locations and orientations of complexes with 2DTM. Mismatches  
558 between the template and cellular target resulting from species-specific structures reduce the



559 2DTM SNR (**Figure 4c**). By comparing the 2DTM SNRs of a series of structures from different  
560 species, it may be possible to infer evolutionary relationships in a manner analogous to DNA  
561 sequence comparison. Structural comparison with 2DTM would present the additional advantage  
562 of defining structural conservation which may not be evident by sequence comparison alone  
563 without the need to build a detailed molecular model of homologs in each species.

564 We have shown that it is possible to generate *in situ* 3D reconstructions of ribosomes from 2D  
565 images of cells, without the need to collect a tilt series (**Figures 3&4**). Template bias (discussed  
566 above) becomes especially pertinent when using a template from a different species when there  
567 is no existing structure to validate the obtained map. In a 3D reconstruction from 50S located by  
568 2DTM with a *B. subtilis* 50S template we identified density corresponding to *M. pneumoniae*  
569 specific protein structures, and failed to detect density corresponding to a *B. subtilis* specific  
570 protein (**Figure 4f-g**). This demonstrates that by using a sufficiently high threshold to prevent a  
571 preponderance of false positives, targets identified using 2DTM templates from different species  
572 can be averaged to generate *in situ* 3D reconstructions with minimal template bias. Many  
573 biologically important organisms are difficult to grow at scales necessary for protein-purification  
574 and *in vitro* structure determination. Cryo-ET is also often limited by computationally  
575 demanding image processing, thus hindering routine *in situ* structure determination. 2DTM could  
576 be used as an alternative tool to accelerate *in situ* structure determination in non-model  
577 organisms.

578

### 579 **2DTM and 3DTM complement each other**

580 A significant challenge in using cryo-EM to study complexes *in situ* arises from the thick and  
581 crowded nature of the sample. The structural noise from neighboring particles is only correlated  
582 at low-resolution in projections recorded at different sample tilts. 3DTM is able to benefit from  
583 this indirectly by searching reconstructions which essentially "disentangle" the targets from this  
584 structural noise. While overlapping density cannot be removed in single-tilt images used for  
585 2DTM, overlapping targets can still be separated based on their different x,y coordinates and  
586 defocus values (z coordinate). For example, using 2DTM we were able to discern overlapping  
587 50S ribosomes, as validated by comparison with the 3DTM results (**Figure 6f-i**). Thus,  
588 separating overlapping particles does not require collecting a tilt series. Furthermore, because the  
589 structural noise is only correlated at low-resolution, a fine-grained search as in current versions  
590 of 2DTM, carried out with two or three tilted images may provide a better detection strategy to  
591 be implemented in the future.

592 While the results of 3DTM do not seem to be correlated with sample thickness within the tested  
593 range (**Figure 5 - figure supplement 2**), it is difficult to tell if this is due to a better overall  
594 performance of 3DTM in thicker samples, for example due to the separation of overlapping  
595 densities, or if 3DTM is simply less sensitive to the signal degradation associated with thicker

596 samples, for example by multiple and inelastic scattering. The latter seems more likely since  
597 3DTM depends primarily on low-resolution signal, which in cryo-EM data is usually  
598 substantially stronger than high-resolution signal and therefore remains detectable in  
599 thicker samples despite signal degradation. While the stronger reliance on low-resolution  
600 features makes 3DTM less sensitive to sample thickness and image-degrading factors, its high  
601 false positive rate requires extensive expert curation, often exceeding the computational run time  
602 of the original search. Even where time is not a concern, manual curation is difficult if not  
603 impossible in dense regions of a cell, like the nucleus, or for particles smaller than a ribosome  
604 that are not easily visually discernible. Particle classification approaches such as those  
605 implemented in *RELION* can be useful for removing false positives. However, their performance  
606 on noisy subtomograms of relatively small complexes remains problematic.

607 Using the full electron dose in a single exposure allows for the inclusion of high-resolution  
608 information in a 2DTM search, which improves its precision and enables detection in dense  
609 molecular environments. However, as we show, this comes at the expense of lower recall in thick  
610 samples, and the lack of multiple sample tilts lowers the positional accuracy perpendicular to the  
611 image plane. In principle, 3DTM could also take advantage of high-resolution information, but in  
612 practice this is currently not achieved, possibly due to increased specimen motion on multiple  
613 exposures, errors in the CTF determination from very low-dose exposures, difficulty in aligning  
614 tilt series, and increasing sample thickness as a function of tilt (Voortman et al., 2014). New  
615 approaches that take into account sample deformation (Himes & Zhang, 2018; Tegunov et al.,  
616 2021) may help boost the high-resolution signal in tomograms.

617 3DTM may benefit from machine learning algorithms that can be trained to distinguish signal  
618 from noise and thereby reduce false positives (Moebel et al., 2020). Although, to our knowledge,  
619 this has not yet been tested, machine learning may also improve the performance of 2DTM for  
620 similar reasons. Better overall performance of template matching may additionally be achieved  
621 by combining the high precision of 2DTM with the high recall of 3DTM, making this approach  
622 an effective and informative strategy for visual proteomics. In such a strategy, a zero-tilt image  
623 with higher dose is collected before collecting a tilt series. The molecules of interest are then  
624 identified in both 2D image and 3D tomogram, the 2D search is used to validate hits in the  
625 tomogram, and the 3D coordinates provide context in 3D space and higher accuracy in the z  
626 coordinates (e.g., **Figure 5a-b**). Similar approaches that leverage the different information  
627 available from 2D images and 3D tomograms have been suggested previously (Alberto  
628 Bartesaghi et al., 2012; Sanchez et al., 2020). Moreover, since the image modalities (2D vs 3D)  
629 are distinct in the two methods, the noise and background in the data are only partially related: (i)  
630 Layers of the sample overlapping in the 2D image can be separated in the tomogram. (ii) The  
631 imaging parameters (effective image contrast/defocus, electron dose) as well as the random noise  
632 accompanying all cryo-EM data differ between the 2D and 3D data. (iii) Template matching in  
633 2D and 3D relies on different resolution ranges – 3DTM depends strongly on shape information  
634 ( $\sim 20$  Å) while 2DTM depends on 3 – 5 Å resolution. Overlapping hits can therefore be

635 considered to be true positives with high confidence. The requirement of dual detection may  
636 allow the detection threshold to be lowered in each search, increasing the overall number of true  
637 positives. Such an approach could speed up workflows by avoiding the need for labor-intensive  
638 classification and refinement of 3DTM datasets, while incorporating the additional structural  
639 context provided by a tomogram.

640

## 641 **Future of template matching and conclusions**

642 We describe here the implementation of a GPU-accelerated 2DTM method into the graphical  
643 user interface of the open-source software *cisTEM*. 2DTM effectively detects ribosomes in 2D  
644 images of frozen *M. pneumoniae* cells at higher specificity, but lower sensitivity than 3DTM in  
645 samples thicker than 100 nm. We propose that an effective, high-confidence strategy for *in situ*  
646 visual proteomics would combine 2DTM and 3DTM and would not be limited to species for  
647 which high-resolution structures are available. We also propose that the search space of 2DTM  
648 could be further expanded to include a more detailed analysis of the signal present in an image,  
649 allowing for interrogation of conformational or compositional variability, by searching with a  
650 multi-template library. We demonstrated that 3D reconstructions from targets detected by 2DTM  
651 reveal new features not present in the template. This technique, therefore, has the potential to  
652 deliver *in situ* structures at high resolution, similar to subtomogram averaging but requiring less  
653 experience and time. While it requires prior knowledge of the target structure to be  
654 reconstructed, i.e., a template, the 2DTM workflow (including data collection) is significantly  
655 faster than tomography, and may therefore be more suitable for high-throughput studies. Finally,  
656 the need for averaging may limit detailed interrogation of molecular structures to more abundant  
657 complexes. The spatial organization, structures, composition and functional states of rare  
658 complexes can still be studied in cells by 2DTM, provided they are detectable in 2D images.  
659 With further improvements, we expect 2DTM to reveal new insights into the molecular  
660 mechanisms of biological processes in their native cellular context.

661

## 662 **Methods**

### 663 **Cell culture, grid preparation and cryo-EM imaging**

664 *Mycoplasma pneumoniae* sample preparation and cryo-EM imaging were carried out as  
665 described previously (O'Reilly et al., 2020; Tichelaar et al., 2020). In brief, *M. pneumoniae* cells  
666 were grown on Quantifoil gold grids in modified Hayflick medium and the grid was quickly  
667 washed with PBS buffer with 10 nm gold fiducial beads (Aurion, Germany) before plunge-  
668 freezing. The grids were imaged in a 300 keV Krios TEM (ThermoFisher) equipped with a direct

669 detector (Gatan) and a quantum post-column energy filter (Gatan). Data collection was done  
670 using SerialEM (Mastrorade, 2005).

671 For the 2D images paired with tilt-series data, 19 cells were first imaged following the SPA  
672 standard, with the magnification of 215,000 (pixel size 0.65 Å) and exposure time of 2 seconds  
673 (20 frames, total exposure dose 32 e<sup>-</sup>/Å<sup>2</sup>). The target defocus of 0.2 μm to 0.5 μm. Tilt-series  
674 were collected using the dose-symmetric scheme (Hagen et al., 2017) with the following  
675 settings: magnification 81,000 (pixel size 1.7 Å), tilt range -60° to 60° with 3° increment,  
676 exposure time per tilt 1 second, total exposure dose ~129 e<sup>-</sup>/Å<sup>2</sup>. The target defocus remained the  
677 same within tilt-series, and ranged from 1.5 μm to 3.5 μm between tilt-series.

678 A dataset of 220 2D images of *M. pneumoniae* were collected on a K3 camera (Gatan) and at a  
679 magnification of 81,000 (pixel size 1.503 Å). The K3 camera was run in non-CDS mode with the  
680 following settings: exposure time 1.678 second, 24 frames, total exposure dose ~31 e<sup>-</sup>/Å<sup>2</sup>.

681

## 682 **2D template generation**

683 To generate templates for 2DTM, we used the computer program *pdb2mrc* (Tang et al., 2007) to  
684 convert PDB-formatted atomic coordinates into 3D density. To reduce potential aliasing, we  
685 initially generated an over-sampled density map at half the pixel size of the image to be  
686 searched. The sampling rate was then halved to the final value pixel size by Fourier cropping  
687 using the program *resample* from the *cisTEM* software package (Grant et al., 2018). The  
688 resulting 3D density was low-pass filtered with the standalone program *bfactor* (Grigorieff,  
689 2021a) using a B-factor of 85 Å<sup>2</sup> and placed into a 256 x 256 x 256 voxel box, about twice the  
690 size of the 50S ribosomal subunit it contained. The final pixel size for searching the 19-image  
691 dataset of *M. pneumoniae* that was compared with tomograms was of 1.27 Å. For computational  
692 efficiency, we used a final pixel size of 1.5 Å to search the 220-image dataset. As template  
693 models, we used the *M. pneumoniae* ribosome (PDB: in progress; EMDB 11999) and the *B.*  
694 *subtilis* ribosome (PDB: 3J9W). We separated the small and large ribosomal subunits and, for the  
695 *B. subtilis* ribosome, removed the mRNA, tRNAs and MifM protein from the coordinate file  
696 using custom Perl scripts. The resulting coordinates were aligned with *USCF Chimera* (Pettersen  
697 & Goddard, 2004) to the 50S template used for 3DTM to place them in a common coordinate  
698 system. This ensured that the 3D positions and Euler angles found by 2DTM and 3DTM referred  
699 to the same coordinate system and could be directly compared. For local 30S searches, the  
700 atomic coordinates corresponding to the body of the *M. pneumoniae* 30S were used to generate a  
701 template as described above. For this we combined the results of searches with two templates,  
702 one with the proteins and rRNA sequence corresponding to the 30S head and one without, to  
703 account for the greater conformational variability of the small subunit relative to the large  
704 subunit.

## 705 **2D template matching in *cis*TEM**

706 Movie frames were aligned with *unblur* using the "optimal exposure filter" (Grant & Grigorieff,  
707 2015) and including all frames in the final sum, unless otherwise indicated. Defocus was  
708 determined by *CTFFIND4* (Rohou & Grigorieff, 2015) from within the *cis*TEM GUI (Grant et  
709 al., 2018). Templates for 2DTM were imported into *cis*TEM as 3D volumes and 2DTM was  
710 performed on all images, including a defocus search over a 2400 Å range centered on the  
711 average defocus determined by *CTFFIND4* with a 200 Å step, using a 2.5° out of plane angular  
712 search step and a 1.5° in plane angular search step, assuming C1 symmetry and a minimum  
713 target - target distance (peak radius) of 10 pixels (~13 Å). As previously described, the SNR  
714 values resulting from 2DTM were further normalized by subtracting the mean of the SNR values  
715 for all orientations at each location, and dividing by their standard deviation (Rickgauer et al.,  
716 2017, 2020). The best peak radius to use in a search depends on the B-factor affecting the signal  
717 in the images and may, therefore, vary for different experiments.

718

## 719 **Detection of 30S by local search using 50S 2DTM coordinates**

720 To detect 30S subunits bound to 50S subunits, we wrote *refine\_template*, a computer program  
721 that is accessible through *cis*TEM's GUI, or as a command line tool. *refine\_template* reads the  
722 3D template and the output files of a template search, including the MIP and alignment  
723 parameters for detected targets. Using these data, it calculates template projections and performs  
724 a local refinement of the projection parameters. This refinement can be used, for example, to find  
725 the defocus values that maximize the cross-correlation coefficient between projection and image.  
726 It can also be used to detect molecules and complexes bound to already detected targets. In this  
727 case, *refine\_template* is used with the search results obtained for the detected targets, but with  
728 the bound complex to be detected as the input template. The locally refined alignment  
729 parameters found for the bound complex will be close to those found for the original template,  
730 provided both the original template used in the search and the bound complex in the refinement  
731 share the same coordinate system.

732 To ensure the coordinate systems of the *M. pneumoniae* 30S and 50S subunits were aligned, the  
733 coordinates for the 30S and 50S subunits were separated from the 70S into two coordinate files  
734 and used to generate 3D templates for 2DTM for each of them (see above). For this last step, it  
735 was important not to use the *-center* flag of *pdb2mrc* to make sure the 3D densities remained in  
736 their correct locations relative to the other subunit. 50S targets were then detected using the 50S  
737 template, followed by local refinement with *refine\_template* and the 30S template. For the  
738 refinement, we searched within an angular range of +/- 12.5° using a 2.5° step. A 30S was  
739 deemed to be present when the refined x,y coordinates were within 20 Å of the original  
740 coordinates found for the 50S template.

### 741 3D reconstruction using 50S 2DTM coordinates

742 We wrote a new computer program called *make\_particle\_stack*, as part of the *cisTEM* image  
743 processing package. It reads the results of a template search, including the MIP with the peaks  
744 indicating detected targets, as well as the Euler angles of the detected targets, the original image  
745 that was searched, and other imaging parameters (defocus, amplitude contrast, lens aberrations,  
746 beam energy and pixel size). On output, it will generate a stack of boxed-out targets and a list of  
747 alignment parameters that can be used for 3D reconstruction with *cisTEM*. Using  
748 *make\_particle\_stack* and *cisTEM*, we generated a reconstructions from 5,080 and 1,172 50S  
749 targets detected in 220 images of *M. pneumoniae* cells, using the Euler angles and x,y locations  
750 assigned by the *M. pneumoniae* and *B. subtilis* 50S template search, respectively. The  
751 reconstructions had nominal resolutions of 4.3 Å and 5.5 Å, respectively (FSC threshold of  
752 0.143, (Rosenthal & Henderson, 2003), **Figure 3 - figure supplement 1e**, **Figure 4 - figure**  
753 **supplement 1b**). However, visible density of known ribosome features (not shown) suggested  
754 that this resolution estimate was unrealistically high, as expected due to the well-known effect of  
755 template bias (Stewart & Grigorieff, 2004). We therefore low-pass filtered the reconstructions to  
756 20 Å resolution. The low-pass filtered reconstructions reproduced the 50S density, except for a  
757 few details in peripheral features (see Results). They also revealed additional clear density for  
758 the 30S subunit, albeit weaker than the 50S density, and density that corresponds to tRNAs in  
759 conformations consistent with translating ribosomes (see Results).

760

### 761 3D template matching

762 For tilt-series data, movie frames were aligned on-the-fly using the SerialEM plug-in  
763 *alignframes*. Tilt-series alignment was carried out in IMOD (Mastrorarde & Held, 2017). Warp  
764 was used to estimate CTF, import tilt-series alignments from IMOD, reconstruct tomograms and  
765 subtomograms (Tegunov et al., 2021). Cell thickness was estimated based on central Y-Z  
766 sections of the tomograms.

767 We used PyTom to perform 3DTM of tomograms as described previously (Hrabe et al., 2012;  
768 O'Reilly et al., 2020). The 50S ribosome template was generated from a previous 50S class  
769 average from *M. pneumoniae* (O'Reilly et al., 2020). The density was low-pass filtered to 30 Å  
770 resolution prior to template matching in PyTom. 3DTM hits were extracted from the scores map  
771 generated by PyTom and were ranked by cross-correlation scores for each tomogram.  
772 Subtomograms for the top 600 hits in each tomogram were extracted using Warp. 3D  
773 classification and refinement were done in *RELION* 3.0.8 (Zivanov et al., 2018). In total, 3062  
774 70S and 6336 50S subtomograms were classified, after removing the 1827 false positives, i.e.,  
775 particles that could not be aligned (**Figure 5 - figure supplement 1**).

776

## 777 Comparison of 2DTM and 3DTM

778 To compare targets found by 2DTM and 3DTM, we wrote a new computer program,  
779 *align\_coordinates*, as part of *cisTEM* (Grant et al., 2018), to identify and align target  
780 coordinates. *align\_coordinates* assumes that the z-axes of the coordinate systems of the 2DTM  
781 and 3DTM searches are aligned, i.e., they refer to the same sample tilt. Therefore, to find the  
782 angular alignment and x,y offset between a set of reference coordinates and a second set of  
783 sample coordinates, only the x,y coordinates need to be considered. In a first step,  
784 *align\_coordinates* calculates all possible vectors between any two x,y coordinates in a coordinate  
785 set. A rotation matrix is applied to the sample coordinate vectors, and the vector with the  
786 smallest vector difference within a given tolerance is found with respect to each reference vector.  
787 The algorithm performs a systematic search of the rotation angle in 0.5° steps to find the rotation  
788 that produces the largest number of matching vectors while giving a higher weight to better  
789 matching vectors. The result of this systematic search is a rough rotation angle and a list of  
790 corresponding coordinates that define a coordinate transform. The search also identifies  
791 coordinates in each set that do not have corresponding coordinates in the other set. The  
792 coordinate transform is then refined, and the list of corresponding coordinates is updated using a  
793 finer local search with angular step of 0.01° and 1-Å steps along the x and y axes. The best  
794 coordinate transform is selected based on a least-squares fit between the corresponding  
795 coordinates.

796 In the comparison of 2DTM and 3DTM coordinates, the latter were used as a reference set, and  
797 the distance threshold for correspondence was set to 110 Å. The final list of corresponding  
798 targets was further reduced by limiting distances to 100 Å and below. By providing the  
799 dimensions of the field of view of the images used for 2DTM, it was also possible to identify the  
800 corresponding area within the larger field of view of tomograms analyzed by 3DTM. For the  
801 calculation of percentages of corresponding targets identified by each search, only targets in the  
802 overlapping areas were counted.

803 To compare the angular orientations for a given coordinate pair, the 2DTM template was first  
804 aligned relative to the 3DTM template (see above), and the Euler angles of the detected targets  
805 were recorded. The total angular distance between each orientation, represented by the rotation  
806 matrices  $R_2$  and  $R_3$ , given by the Euler angles, was calculated using the equation (Huynh, 2009)

$$807 \quad \Delta\vartheta_{2,3} = \cos^{-1}\left[\frac{\text{tr}(R_2 R_3^T) - 1}{2}\right]. \quad \text{Eq. (1)}$$

808

809

810

## 811 **Acknowledgements**

812 We are grateful to Wim Hagen for advice on cryo-EM data acquisition, and Peter Rickgauer for  
813 providing numerous fruitful discussions and advice on implementing template matching in  
814 *cis*TEM. JM acknowledges support from the EMBL and the European Research Council  
815 (760067).

816

## 817 **Author contributions**

818 BAL, Designed experiments, analyzed data, discussed and interpreted results, and wrote and  
819 revised the manuscript; BAH, Designed and wrote GPU-enabled software for 2D template  
820 matching, discussed and interpreted results, and wrote and revised the manuscript; LX, Designed  
821 experiments, collected and analyzed data, discussed and interpreted results, and helped edit the  
822 manuscript; TG, Implemented the CPU version of 2D template matching in *cis*TEM and  
823 designed and implemented the graphical user interface and data structure used with it, and helped  
824 edit the manuscript; JM, Designed experiments, discussed and interpreted results, and helped edit  
825 the manuscript; NG, Conceived the project, designed experiments, analyzed data, discussed and  
826 interpreted results, and wrote and revised the manuscript.

827

## 828 **Competing Interests**

829 The authors declare no competing interest.

830

## 831 **Software Availability:**

832 All the code used for the 2D template matching has an open source license and is freely available  
833 from the *cis*TEM github repository, <https://github.com/timothygrant80/cisTEM>. For the purpose  
834 of reproducibility, the code base at the time of submission is publicly archived (Himes et al.,  
835 2021).

836

837

838

839

840



## 841 **Figure legends**

842 **Figure 1: *cis*TEM GUI implementation of 2DTM.** (a) Screenshot showing the results of a  
843 2DTM search in the *cis*TEM GUI (located in the “Experimental” tab). The panel on the left  
844 shows all images searched. Images may be searched individually (column #1) or as batch jobs  
845 (column #2). The Results tab shows the locations, orientations and SNR values of each detected  
846 target in a list, as well as the original image (b) (membrane highlighted in yellow), the maximum  
847 intensity projection (MIP, c) and the plotted result (d), which shows the best-matching  
848 orientation of the template at each detected location. The survival histogram (subpanel in (a))  
849 shows the SNR values for all search locations (blue line) and compares this with the survival  
850 histogram of Gaussian noise (red line). This is used to establish the threshold at which a single  
851 false positive is expected per image. Scale bar in (b) = 500Å.

852 **Figure 2: GPU acceleration of 2DTM in *cis*TEM.** (a) The angular search space is distributed  
853 among any number of processors using the home-grown MPI-like socket communication in the  
854 *cis*TEM GUI (Grant et al., 2018). Unlike MPI, if fewer processors are available than requested  
855 (shaded box) processing may still proceed. (b) To expose further parallelism, additional host  
856 threads may be requested to subdivide each angular group to maximize occupancy on the GPU.  
857 Each host thread queues up a series of GPU kernels into its respective stream, and then returns to  
858 calculate the next projection and initiates its transfer to the GPU (green box). This way, close to  
859 100% of the CPU and GPU is used during computation. (c) GPU acceleration relative to  
860 optimized CPU-based calculation, of which 85% is spent on MKL-based FFTs. Kernel-fusion  
861 using cuFFT callbacks and custom data structures combined with flexible kernel launch  
862 parameters ensure the GPUs stay saturated, enabling an 8x speedup. A total of 10.5x speedup is  
863 achieved by optimizing data throughput using the vectorized FP16 format for storing results. (d)  
864 The code scales nearly linearly with the number of GPUs and tracks with the total memory  
865 bandwidth of a given model. All timing was obtained using a padded K3 image with 4096 x  
866 5832 pixels, and searching one defocus plane with 2.5°/1.5° angular steps.

867 **Figure 3: 2DTM detects ribosomes in *Mycoplasma pneumoniae* cells.** (a) An overview of  
868 2DTM: a cryoEM-like density was generated from an *M. pneumoniae* 50S model, a B-factor was  
869 applied and the resulting template used to identify locations and orientations of 50S in 2D  
870 images of *M. pneumoniae* cells with 2DTM implemented in *cis*TEM. Scale bar = 500Å (b) 20-Å  
871 filtered 3D reconstruction generated using the locations and orientations of 5,080 50S subunits  
872 detected in 220 images using 2DTM with a *M. pneumoniae* 50S template, showing clear density  
873 for the 30S ribosomal subunit (not included in the template). (c) Difference map showing the  
874 regions of the 3D reconstruction that differ from the 50S 2DTM search template. Arrows  
875 indicate additional density consistent with 70S ribosome structures. The difference map was  
876 generated with the same threshold as in (b). (d) A region of the difference map shown in (c),  
877 showing tRNAs in characteristic arrangements in the E, P and A sites of the 30S subunit. *M.p.*:  
878 *M. pneumoniae*

879 **Figure 4: 2DTM using a *B. subtilis* 50S template reveals species-specific structures.** (a)  
880 Molecular models of *B. subtilis* (red) and *M. pneumoniae* (blue) 50S ribosomal subunits aligned  
881 using Chimera. (b) Venn diagram showing the number of 50S subunits detected in the same  
882 dataset of 220 images of *M. pneumoniae* cells using the indicated template. (c) Boxplot showing  
883 the distribution of 2DTM SNR values of the locations quantified in the diagram in (b). The width  
884 of the box indicates the interquartile range, the middle line indicates the median and the whiskers  
885 indicate the range. The dashed vertical line indicates the 2DTM SNR threshold used. (d) 20-Å  
886 filtered 3D reconstruction generated using the locations and orientations of 1,172 50S subunits  
887 detected in 220 images using 2DTM with a *B. subtilis* 50S template, showing clear density for  
888 the 30S ribosomal subunit and L7/L12 (not included in the template). The threshold was selected  
889 to reflect the threshold used in **Figure 3b&c**. (e) Difference map showing the regions of the 3D  
890 reconstructions that differ from the 50S 2DTM search template. Arrows indicate additional  
891 density consistent with 70S ribosome structures. (f) Difference map as described in (e) (gray  
892 mesh), aligned to the *B. subtilis* 50S template (red) and both *M. pneumoniae* (*M.p.*, blue) and *B.*  
893 *subtilis* (red, not visible) molecular models. The difference map was generated with the same  
894 threshold as in (d). (g) 3D reconstruction as described in (d) (transparent gray), aligned to *M.*  
895 *pneumoniae* (*M.p.*, blue) and *B. subtilis* (*B.s.*, red) molecular models.

896 **Figure 5: Comparison of ribosome detection by 2DTM and 3DTM.** (a) Images of untilted  
897 cryo-EM grids of *M. pneumoniae* were collected with a total dose of  $32 \text{ e}^-/\text{Å}^2$ , followed by a tilt  
898 series of an overlapping region with a total dose of  $129 \text{ e}^-/\text{Å}^2$  to reconstruct a tomogram. (b) 50S  
899 ribosomal subunits were identified in the 2D images by 2DTM with the *M. pneumoniae* 50S  
900 (left) and in the 3D tomogram by 3DTM using the 50S as a template (right). The 2DTM and  
901 3DTM templates were aligned to ensure that the respective coordinate systems were aligned, and  
902 that the x,y coordinates of the detected 50S in each search could be aligned. (c) The proportion  
903 of 2DTM and 3DTM coordinates within 100 Å and  $10^\circ$  in each of the three Euler angles in 19  
904 images was calculated using an SNR threshold that allowed either one false positive per image  
905 (upper), or detection of ~2 times more potential 50S targets (lower). (d) Plot showing the  
906 proportion of 2DTM targets that were also detected by 3DTM as a function of sample thickness.  
907 (e) Plot showing the proportion of 3DTM targets that were also detected by 2DTM as a function  
908 of sample thickness. (f) Plot showing the proportion of 2DTM 50S targets with a positional and  
909 rotational 3DTM match at the indicated 2DTM SNR threshold (dashed line). (g) Plot showing  
910 the number of expected false positives in the 2DTM search assuming a Gaussian noise model  
911 (black) and the observed number of 2DTM targets without a matching 3DTM target (blue) at the  
912 indicated 2DTM SNR.

913 **Figure 6: 2DTM is specific, excludes non-ribosome particles and permits detection of**  
914 **ribosomes overlapping along the projection direction.** (a) Pie chart showing the results of a  
915 comparison of a set of 1,380 3DTM coordinates initially identified by PyTom followed by 3D  
916 classification in *RELION* that identified 989 targets as 50S or 70S (left) and 391 targets as non-  
917 ribosomal particles (right), with a list of 652 50S 2DTM targets. Red indicates the proportion

918 aligning with 50S coordinates identified by 2DTM; gray indicates non-matching 3DTM  
919 coordinates. (b) Pie charts showing the proportion of 50S detected by 2DTM with the *M.*  
920 *pneumoniae* template with a bound 30S target as determined by performing a local search with  
921 *refine\_template* (see Methods) (left), and the ratio of 3DTM 50S targets classified as 70S or 50S  
922 by *RELION* (right). (c) Histogram showing the distribution of the in-plane distance between  
923 matched 3DTM and 2DTM after 3DTM refinement of the subtomograms with *RELION*. (d) As  
924 in (c), showing the angular distance. (e) As in (c), showing the out-of-plane difference (z  
925 coordinate) before (blue) or after (yellow) 2DTM refinement of z-coordinates. (f) Plotted result  
926 from a 2DTM search showing template projections at the locations and Euler angles of detected  
927 50S subunits (left), inset showing two overlapping 50S subunits when viewed parallel to the  
928 image plane. (g) As in (f), showing the plotted result from 3DTM of the same area aligned to  
929 show the same perspective. (h) The template projections in (f) rotated 90° to show the  
930 overlapping 50S perpendicular to the image plane. (i) As in (h), showing the result from 3DTM  
931 in the same area, faded density reflects a 50S in the tomogram that was not detected in the 2D  
932 image.

933 **Figure 1 - Supplement 1:** The 2DTM matching algorithm as implemented in *cisTEM*. Inputs to  
934 various stages are in hexagons. If the GPU is used, all memory allocations are handled by the  
935 *TemplateMatchingCore* class via calls to the underlying *GpuImage* class. The whitening filter  
936 and CTF are combined on the host and if needed, copied to the GPU once for each defocus plane  
937 searched. The inner loop (**Figure 2 - figure supplement 1**) is executed and results returned to  
938 the host.

939 **Figure 2 - Supplement 1:** (a) The 2DTM matching inner loop as implemented on the GPU in  
940 *cisTEM*. (b) Approximate percentage of run time for each step. The relative percentages can vary  
941 based on the automatic load balancing due to the combination of CUDA streams and mixed  
942 kernel launch configurations that restrain some low-complexity operations to a small subset of  
943 available streaming multi-processors via grid-stride loops.

944 **Figure 3 - Supplement 1:** (a) Boxplot showing the distribution of 2DTM SNR values in a  
945 representative image using an *M. pneumoniae* 50S template with the indicated B-factor applied.  
946 The boxes indicate the interquartile range, the middle line indicates the median, the whiskers  
947 indicate the 10-90<sup>th</sup> percentiles and the dots indicate 50S peaks with SNRs outside this range. (b)  
948 As in (a), showing the distribution of 2DTM SNRs in images whereby 8 (12.8 e/Å<sup>2</sup>) or 20 (32  
949 e/Å<sup>2</sup>) frames with or without exposure weighting were used to generate the final image as  
950 indicated. (c) Bar chart showing the number of detected 50S when 13 defocus planes are  
951 searched, relative to the number when a single defocus plane is searched. Individual images of  
952 indicated thickness are shown separately. (d) Scatterplot showing the mean 2DTM SNR of 50S  
953 identified in images with >10 peaks relative to the mean defocus of the image calculated using  
954 *CTFFIND4*. (e) FSC obtained for the 3D reconstruction (shown in **Figure 3b**) calculated from  
955 the targets found by 2DTM.

956 **Figure 4 - Supplement 1:** (a) Fourier shell correlation (FSC) curve showing the correlation  
957 between the *M. pneumoniae* and *B. subtilis* templates. (b) FSC obtained for the 3D  
958 reconstruction calculated from the targets found by 2DTM (shown in **Figure 4d**). (c) Image  
959 showing the *B. subtilis* 50S template (red) aligned with the *M. pneumoniae* 50S model (blue), *B.*  
960 *subtilis* 50S model (not visible), the difference map from **Figure 4e** (gray mesh) and the  
961 difference map from **Figure 3c**. White arrow indicates the *M. pneumoniae*-specific C-terminal  
962 extension of L22, the black arrows indicate unattributed density that is common to both  
963 difference maps.

964 **Figure 5 - Supplement 1:** (a) Cross-correlation scores for the top 600 hits detected in 3DTM  
965 using a 50S template. (b) Classification of the subtomograms in *RELION*. (c) Bar chart showing  
966 the proportion of ranked 3DTM hits classified as false positives (yellow), 50S (green; used as a  
967 template) or 70S (purple) by classification in *RELION*. The ranked hits are binned in sets of 3.

968 **Figure 5 - Supplement 2:** (a) Scatterplot showing the mean 2DTM SNR of the 19 images  
969 searched in **Figure 5** relative to the sample thickness calculated from a tomogram. The size of  
970 each point is proportional to the total number of 50S detected with 2DTM as shown in the legend  
971 (right). (b) As in (a), showing the number of 50S detected with 3DTM in the area of the  
972 tomogram overlapping the 2D image. (c) Scatterplot showing the 2DTM SNR relative to the  
973 3DTM cross-correlation (CC) score of all 576 targets identified in **Figure 5**.

974 **Figure 6 - Supplement 1:** Proportional bar chart showing the percentage of all 983 3DTM  
975 targets in the area of the tomogram overlapping with the 2D image or the 576 that were also  
976 detected by 2DTM, that were classified as 50S (orange) or 70S (blue) by *RELION*.

977

978 **References:**

- 979 Abeyrathne, P. D., Koh, C. S., Grant, T., Grigorieff, N., & Korostelev, A. A. (2016). Ensemble  
980 cryo-EM uncovers inchworm-like translocation of a viral IRES through the ribosome.  
981 *ELife*, 5, 1–31. <https://doi.org/10.7554/eLife.14874>
- 982 Albert, S., Schaffer, M., Beck, F., Mosalaganti, S., Asano, S., Thomas, H. F., Plitzko, J. M.,  
983 Beck, M., Baumeister, W., & Engel, B. D. (2017). Proteasomes tether to two distinct sites at  
984 the nuclear pore complex. *Proceedings of the National Academy of Sciences*, 114(52),  
985 201716305. <https://doi.org/10.1073/pnas.1716305114>
- 986 Alberts, B. (1998). The Cell as a Collection of Protein Machines : Preparing the Next Generation  
987 of Molecular Biologists. *Cell*, 92, 291–294.
- 988 Allegretti, M., Zimmerli, C. E., Rantos, V., Wilfling, F., Ronchi, P., Fung, H. K. H., Lee, C. W.,  
989 Hagen, W., Turoňová, B., Karius, K., Börmel, M., Zhang, X., Müller, C. W., Schwab, Y.,  
990 Mahamid, J., Pfander, B., Kosinski, J., & Beck, M. (2020). In-cell architecture of the  
991 nuclear pore and snapshots of its turnover. *Nature*, 586(7831), 796–800.  
992 <https://doi.org/10.1038/s41586-020-2670-5>
- 993 Asano, S., Fukuda, Y., Beck, F., Aufderheide, A., Förster, F., Danev, R., & Baumeister, W.  
994 (2015). A molecular census of 26. *Science (New York, N.Y.)*, 347(6220), 439–443.
- 995 Bartesaghi, A., Sprechmann, P., Liu, J., Randall, G., Sapiro, G., & Subramaniam, S. (2008).  
996 Classification and 3D averaging with missing wedge correction in biological electron  
997 tomography. *Journal of Structural Biology*, 162(3), 436–450.  
998 <https://doi.org/10.1016/j.jsb.2008.02.008>
- 999 Bartesaghi, Alberto, Lecumberry, F., Sapiro, G., & Subramaniam, S. (2012). Protein secondary  
1000 structure determination by constrained single-particle cryo-electron tomography. *Structure*,  
1001 20(12), 2003–2013. <https://doi.org/10.1016/j.str.2012.10.016>
- 1002 Beck, M., & Baumeister, W. (2016). Cryo-Electron Tomography: Can it Reveal the Molecular  
1003 Sociology of Cells in Atomic Detail? *Trends in Cell Biology*, 26(11), 825–837.  
1004 <https://doi.org/10.1016/j.tcb.2016.08.006>
- 1005 Behrmann, E., Loerke, J., Budkevich, T. V., Yamamoto, K., Schmidt, A., Penczek, P. A., Vos,  
1006 M. R., Bürger, J., Mielke, T., Scheerer, P., & Spahn, C. M. T. T. (2015). Structural  
1007 Snapshots of Actively Translating Human Ribosomes. *Cell*, 161(4), 845–857.  
1008 <https://doi.org/10.1016/j.cell.2015.03.052>
- 1009 Berman, H. M., Battistuz, T., Bhat, T. N., Bluhm, W. F., Bourne, P. E., Burkhardt, K., Feng, Z.,  
1010 Gilliland, G. L., Iype, L., Jain, S., Fagan, P., Marvin, J., Padilla, D., Ravichandran, V.,  
1011 Schneider, B., Thanki, N., Weissig, H., Westbrook, J. D., & Zardecki, C. (2002). The  
1012 protein data bank. *Acta Crystallographica Section D: Biological Crystallography*, 58(6 D),  
1013 899–907. <https://doi.org/10.1107/S0907444902003451>
- 1014 Bharat, T. A. M., & Scheres, S. H. W. (2016). Resolving macromolecular structures from

- 1015 electron cryo-tomography data using subtomogram averaging in RELION. *Nature*  
1016 *Protocols*, 11(11), 2054–2065. <https://doi.org/10.1038/nprot.2016.124>
- 1017 Bohm, J., Frangakis, A., Hegerl, R., Nickell, S., Typke, D., & Baumeister, W. (2000). Toward  
1018 detecting and identifying macromolecules in a cellular context: template matching applied  
1019 to electron tomograms. *Proceedings of the National Academy of Sciences of the United*  
1020 *States of America*, 97(26), 14245–14250. <https://doi.org/10.1073/pnas.230282097>
- 1021 Braunger, K., Pfeffer, S., Shrimal, S., Gilmore, R., Berninghausen, O., Mandon, E. C., Becker,  
1022 T., Förster, F., & Beckmann, R. (2018). Structural basis for coupling protein transport and  
1023 N-glycosylation at the mammalian endoplasmic reticulum. *Science*, 360(6385), 215–219.  
1024 <https://doi.org/10.1126/science.aar7899>
- 1025 Brilot, A. F., Chen, J. Z., Cheng, A., Pan, J., Harrison, S. C., Potter, C. S., Carragher, B.,  
1026 Henderson, R., & Grigorieff, N. (2012). Beam-induced motion of vitrified specimen on  
1027 holey carbon film. *Journal of Structural Biology*, 177(3), 630–637.  
1028 <https://doi.org/10.1016/j.jsb.2012.02.003>
- 1029 Cai, S., Böck, D., Pilhofer, M., & Gan, L. (2018). The in situ structures of mono-, di-, and  
1030 trinucleosomes in human heterochromatin. *Molecular Biology of the Cell*, 29(20), 2450–  
1031 2457. <https://doi.org/10.1091/mbc.e18-05-0331>
- 1032 Campbell, M. G., Cheng, A., Brilot, A. F., Moeller, A., Lyumkis, D., Veessler, D., Pan, J.,  
1033 Harrison, S. C., Potter, C. S., Carragher, B., & Grigorieff, N. (2012). Movies of ice-  
1034 embedded particles enhance resolution in electron cryo-microscopy. *Structure*, 20(11),  
1035 1823–1828. <https://doi.org/10.1016/j.str.2012.08.026>
- 1036 Diaconu, M., Kothe, U., Schlünzen, F., Fischer, N., Harms, J. M., Tonevitsky, A. G., Stark, H.,  
1037 Rodnina, M. V., & Wahl, M. C. (2005). Structural basis for the function of the ribosomal  
1038 L7/12 stalk in factor binding and GTPase activation. *Cell*, 121(7), 991–1004.  
1039 <https://doi.org/10.1016/j.cell.2005.04.015>
- 1040 Eibauer, M., Hoffmann, C., Plitzko, J. M., Baumeister, W., Nickell, S., & Engelhardt, H. (2012).  
1041 Unraveling the structure of membrane proteins in situ by transfer function corrected cryo-  
1042 electron tomography. *Journal of Structural Biology*, 180(3), 488–496.  
1043 <https://doi.org/10.1016/j.jsb.2012.09.008>
- 1044 Frangakis, A. S., Böhm, J., Förster, F., Nickell, S., Nicastro, D., Typke, D., Hegerl, R., &  
1045 Baumeister, W. (2002). Identification of macromolecular complexes in cryoelectron  
1046 tomograms of phantom cells. *Proceedings of the National Academy of Sciences of the*  
1047 *United States of America*, 99(22), 14153–14158. <https://doi.org/10.1073/pnas.172520299>
- 1048 Frank, J. (2006). *Electron Tomography: Methods for Three-Dimensional Visualization of*  
1049 *Structures in the Cell*. [https://doi.org/10.1007/978-0-387-69008-7\\_4](https://doi.org/10.1007/978-0-387-69008-7_4)
- 1050 Fu, X., Himes, B. a, Ke, D., Rice, W. J., Ning, J., & Zhang, P. (2014). Controlled Bacterial Lysis  
1051 for Electron Tomography of Native Cell Membranes. *Structure (London, England : 1993)*,  
1052 22(12), 1875–1882. <https://doi.org/10.1016/j.str.2014.09.017>

- 1053 Grant, T., & Grigorieff, N. (2015). Measuring the optimal exposure for single particle cryo-EM  
1054 using a 2.6 Å reconstruction of rotavirus VP6. *ELife*, 4, e06980.  
1055 <https://doi.org/10.7554/eLife.06980>
- 1056 Grant, T., Rohou, A., & Grigorieff, N. (2018). *cis TEM*, user-friendly software for single-  
1057 particle image processing. 1–24.
- 1058 Grigorieff, N. (2021a). *bfactor.exe*. <https://grigoriefflab.umassmed.edu/bfactor>
- 1059 Grigorieff, N. (2021b). *diffmap.exe*. <https://grigoriefflab.umassmed.edu/diffmap>
- 1060 Grigorieff, N., & Harrison, S. C. (2011). Near-atomic resolution reconstructions of icosahedral  
1061 viruses from electron cryo-microscopy. *Current Opinion in Structural Biology*, 21(2), 265–  
1062 273. <https://doi.org/10.1016/j.sbi.2011.01.008>
- 1063 Grosjean, H., Breton, M., Sirand-Pugnet, P., Tardy, F., Thiaucourt, F., Citti, C., Barré, A.,  
1064 Yoshizawa, S., Fourmy, D., de Crécy-Lagard, V., & Blanchard, A. (2014). Predicting the  
1065 Minimal Translation Apparatus: Lessons from the Reductive Evolution of Mollicutes. *PLoS*  
1066 *Genetics*, 10(5). <https://doi.org/10.1371/journal.pgen.1004363>
- 1067 Grünewald, K., Medalia, O., Gross, A., Steven, A. C., & Baumeister, W. (2002). Prospects of  
1068 electron cryotomography to visualize macromolecular complexes inside cellular  
1069 compartments: Implications of crowding. *Biophysical Chemistry*, 100(1–3), 577–591.  
1070 [https://doi.org/10.1016/S0301-4622\(02\)00307-1](https://doi.org/10.1016/S0301-4622(02)00307-1)
- 1071 Gubins, I., Schot, G. Van Der, Velkamp, R. C., Förster, F., Du, X., Zeng, X., Zhu, Z., Chang, L.,  
1072 Xu, M., Moebel, E., Lai, T. M., Han, X., Terashi, G., Kihara, D., Himes, B. A., Wan, X.,  
1073 Zhang, J., Gao, S., Hao, Y., ... Zhang, F. (2019). SHREC '19 Track : Classification in  
1074 Cryo-Electron Tomograms. *Eurographics Workshop on 3D Object Retrieval*, 1–6.
- 1075 Hagen, W. J. H., Wan, W., & Briggs, J. A. G. (2017). Implementation of a cryo-electron  
1076 tomography tilt-scheme optimized for high resolution subtomogram averaging. *Journal of*  
1077 *Structural Biology*, 197(2), 191–198. <https://doi.org/10.1016/j.jsb.2016.06.007>
- 1078 Hasler, L., Heymann, J. B., Engel, A., Kistler, J., & Walz, T. (1998). 2D crystallization of  
1079 membrane proteins: Rationales and examples. *Journal of Structural Biology*, 121(2), 162–  
1080 171. <https://doi.org/10.1006/jsbi.1998.3960>
- 1081 Henderson, R. (2013). Avoiding the pitfalls of single particle cryo-electron microscopy: Einstein  
1082 from noise. *Proceedings of the National Academy of Sciences*, 110(45), 18037–18041.  
1083 <https://doi.org/10.1073/pnas.1314449110>
- 1084 Himes, B. A., Grant, T., & Grigorieff, N. (2021). *GPU accelerated 2DTM in cisTEM -*  
1085 *prerelease code*. [https://doi.org/DOI: 10.5281/zenodo.4603401](https://doi.org/DOI:10.5281/zenodo.4603401)
- 1086 Himes, B. A., & Grigorieff, N. (2021). Cryo-TEM simulations of amorphous radiation-sensitive  
1087 samples using multislice wave propagation. *BioRxiv*.  
1088 <https://doi.org/https://doi.org/10.1101/2021.02.19.431636>

- 1089 Himes, B. A., & Zhang, P. (2018). emClarity: software for high-resolution cryo-electron  
1090 tomography and subtomogram averaging. *Nature Methods*, *15*(11), 955–961.  
1091 <https://doi.org/10.1038/s41592-018-0167-z>
- 1092 Hrabe, T., Chen, Y., Pfeffer, S., Cuellar, L. K., Mangold, A., & Förster, F. (2012). PyTom : A  
1093 python-based toolbox for localization of macromolecules in cryo-electron tomograms and  
1094 subtomogram analysis. *Journal of Structural Biology*, *178*(2), 177–188.  
1095 <https://doi.org/10.1016/j.jsb.2011.12.003>
- 1096 Huynh, D. Q. (2009). Metrics for 3D rotations: Comparison and analysis. *Journal of*  
1097 *Mathematical Imaging and Vision*, *35*(2), 155–164. [https://doi.org/10.1007/s10851-009-](https://doi.org/10.1007/s10851-009-0161-2)  
1098 [0161-2](https://doi.org/10.1007/s10851-009-0161-2)
- 1099 Kuhlbrandt, W. (2014). The Resolution Revolution. *Science*, *343*(6178), 1443–1444.  
1100 <https://doi.org/10.1126/science.1251652>
- 1101 Kühner, S., Van Noort, V., Betts, M. J., Leo-Madas, A., Batisse, C., Rode, M., Yamada, T.,  
1102 Maier, T., Bader, S., Beltran-Alvarez, P., Castaño-Diez, D., Chen, W. H., Devos, D., Güell,  
1103 M., Norambuena, T., Racke, I., Rybin, V., Schmidt, A., Yus, E., ... Gavin, A. C. (2009).  
1104 Proteome organization in a genome-reduced bacterium. *Science*, *326*(5957), 1235–1240.  
1105 <https://doi.org/10.1126/science.1176343>
- 1106 Li, X., Mooney, P., Zheng, S., Booth, C. R., Braunfeld, M. B., Gubbens, S., Agard, D. A., &  
1107 Cheng, Y. (2013). Electron counting and beam-induced motion correction enable near-  
1108 atomic-resolution single-particle cryo-EM. *Nature Methods*.  
1109 <https://doi.org/10.1038/nmeth.2472>
- 1110 Ling, C., & Ermolenko, D. N. (2016). Structural insights into ribosome translocation. *Wiley*  
1111 *Interdisciplinary Reviews: RNA*, *7*(5), 620–636. <https://doi.org/10.1002/wrna.1354>
- 1112 Lyumkis, D., Brilot, A. F., Theobald, D. L., & Grigorieff, N. (2013). Likelihood-based  
1113 classification of cryo-EM images using FREALIGN. *Journal of Structural Biology*, *183*(3),  
1114 377–388. <https://doi.org/10.1016/j.jsb.2013.07.005>
- 1115 Mahamid, J., Pfeffer, S., Schaffer, M., Villa, E., Danev, R., Kuhn Cuellar, L., Forster, F.,  
1116 Hyman, A. A., Plitzko, J. M., Baumeister, W., Cuellar, L. K., Förster, F., Hyman, A. A.,  
1117 Plitzko, J. M., Baumeister, W., Kuhn Cuellar, L., Forster, F., Hyman, A. A., Plitzko, J. M.,  
1118 & Baumeister, W. (2016). Visualizing the molecular sociology at the HeLa cell nuclear  
1119 periphery. *Science*, *351*(6276), 969–972. <https://doi.org/10.1126/science.aad8857>
- 1120 Marko, M., Hsieh, C., Schalek, R., Frank, J., & Mannella, C. (2007). Focused-ion-beam thinning  
1121 of frozen-hydrated biological specimens for cryo-electron microscopy. *Nature Methods*,  
1122 *4*(3), 215–217. <https://doi.org/10.1038/nmeth1014>
- 1123 Mastronarde, D. N. (2005). Automated electron microscope tomography using robust prediction  
1124 of specimen movements. *Journal of Structural Biology*, *152*(1), 36–51.  
1125 <https://doi.org/10.1016/j.jsb.2005.07.007>



- 1126 Mastronarde, D. N., & Held, S. R. (2017). Automated tilt series alignment and tomographic  
1127 reconstruction in IMOD. *Journal of Structural Biology*, 197(2), 102–113.  
1128 <https://doi.org/10.1016/j.jsb.2016.07.011>
- 1129 McDonough, R. N. (1995). *Detection of signals in noise* (2nd ed.). Academic Press, Inc.
- 1130 Moebel, E., Martinez-Sanchez, A., Larivière, D., Fourmentin, E., Ortiz, J., Baumeister, W., &  
1131 Kervrann, C. (2020). *Deep Learning Improves Macromolecules Localization and*  
1132 *Identification in 3D Cellular Cryo-Electron Tomograms*.  
1133 <https://doi.org/10.1101/2020.04.15.042747>
- 1134 O'Reilly, F. J., Xue, L., Graziadei, A., Sinn, L., Lenz, S., Tegunov, D., Blötz, C., Singh, N.,  
1135 Hagen, W. J. H., Cramer, P., Stülke, J., Mahamid, J., & Rappsilber, J. (2020). In-cell  
1136 architecture of an actively transcribing-translating expressome. *Science*, 369(6503), 554–  
1137 557. <https://doi.org/10.1126/science.abb3758>
- 1138 Oikonomou, C. M., & Jensen, G. J. (2017). Cellular Electron Cryotomography : Toward  
1139 Structural Biology In Situ. *Annu Rev Biochem*, April, 1–24.  
1140 <https://doi.org/10.1146/annurev-biochem-061516-044741>
- 1141 Pettersen, E. F., & Goddard, T. D. (2004). UCSF Chimera—a visualization system for  
1142 exploratory research and analysis. *Journal of ...* <https://doi.org/10.1002/jcc.20084>
- 1143 Pfeffer, S., Delarue, M., Brittingham, G. P., Pfeffer, S., Surovtsev, I. V, Pinglay, S., Kennedy, K.  
1144 J., Schaffer, M., & Gutierrez, J. I. (2018). mTORC1 Controls Phase Separation and the  
1145 Biophysical Properties of the Cytoplasm by Tuning Article mTORC1 Controls Phase  
1146 Separation and the Biophysical Properties of the Cytoplasm by Tuning Crowding. *Cell*,  
1147 174(2), 338-349.e20. <https://doi.org/10.1016/j.cell.2018.05.042>
- 1148 Pfeffer, S., & Mahamid, J. (2018). Unravelling molecular complexity in structural cell biology.  
1149 *Current Opinion in Structural Biology*, 52, 111–118.  
1150 <https://doi.org/10.1016/j.sbi.2018.08.009>
- 1151 Rickgauer, J. P., Choi, H., Lippincott-Schwartz, J., & Denk, W. (2020). Label-free single-  
1152 instance protein detection in vitrified cells. *BioRxiv*.  
1153 <https://doi.org/10.1101/2020.04.22.053868>
- 1154 Rickgauer, J. P., Grigorieff, N., & Denk, W. (2017). Single-protein detection in crowded  
1155 molecular environments in cryo-EM images. *ELife*, 6, 1–22.  
1156 <https://doi.org/10.7554/eLife.25648>
- 1157 Rigort, A., Bäuerlein, F. J. B., Villa, E., Eibauer, M., Laugks, T., Baumeister, W., & Plitzko, J.  
1158 M. (2012). Focused ion beam micromachining of eukaryotic cells for cryoelectron  
1159 tomography. *Proceedings of the National Academy of Sciences of the United States of*  
1160 *America*, 109(12), 4449–4454. <https://doi.org/10.1073/pnas.1201333109>
- 1161 Rohou, A., & Grigorieff, N. (2015). CTFFIND4: Fast and accurate defocus estimation from  
1162 electron micrographs. *Journal of Structural Biology*, 192(2), 216–221.

- 1163 <https://doi.org/10.1016/j.jsb.2015.08.008>
- 1164 Rosenthal, P. B., & Henderson, R. (2003). Optimal Determination of Particle Orientation,  
1165 Absolute Hand, and Contrast Loss in Single-particle Electron Cryomicroscopy. *Journal of*  
1166 *Molecular Biology*, 333(4), 721–745. <https://doi.org/10.1016/j.jmb.2003.07.013>
- 1167 Sachse, C., Chen, J. Z., Coureux, P., Stroupe, M. E., Fändrich, M., & Grigorieff, N. (2008).  
1168 Fresh Look at Tobacco Mosaic Virus. *Journal of Molecular Biology*, 371(3), 812–835.
- 1169 Sanchez, R. M., Zhang, Y., Chen, W., Dietrich, L., & Kudryashev, M. (2020). Subnanometer-  
1170 resolution structure determination in situ by hybrid subtomogram averaging - single particle  
1171 cryo-EM. *Nature Communications*, 11(1), 1–7. <https://doi.org/10.1038/s41467-020-17466-0>
- 1172 Scheres, S. H. W. (2012). RELION: Implementation of a Bayesian approach to cryo-EM  
1173 structure determination. *Journal of Structural Biology*, 180(3), 519–530.  
1174 <https://doi.org/10.1016/j.jsb.2012.09.006>
- 1175 Scheres, S. H. W. (2015). Semi-automated selection of cryo-EM particles in RELION-1.3.  
1176 *Journal of Structural Biology*, 189(2), 114–122. <https://doi.org/10.1016/j.jsb.2014.11.010>
- 1177 Scheres, S. H. W., & Chen, S. (2012). Prevention of overfitting in cryo-EM structure  
1178 determination. *Nature Methods*, 9(9), 853–854. <https://doi.org/10.1038/nmeth.2115>
- 1179 Schur, F. K. M., Hagen, W. J. H., de Marco, A., & Briggs, J. a G. (2013). Determination of  
1180 protein structure at 8.5Å resolution using cryo-electron tomography and sub-tomogram  
1181 averaging. *Journal of Structural Biology*, 184(3), 394–400.  
1182 <https://doi.org/10.1016/j.jsb.2013.10.015>
- 1183 Sigworth, F. J. (2004). Classical detection theory and the cryo-EM particle selection problem.  
1184 *Journal of Structural Biology*, 145(1–2), 111–122. <https://doi.org/10.1016/j.jsb.2003.10.025>
- 1185 Sigworth, F. J., Doerschuk, P. C., Carazo, J. M., & Scheres, S. H. W. (2010). An introduction to  
1186 maximum-likelihood methods in cryo-EM. In *Methods in Enzymology* (1st ed., Vol. 482,  
1187 Issue C). Elsevier Inc. [https://doi.org/10.1016/S0076-6879\(10\)82011-7](https://doi.org/10.1016/S0076-6879(10)82011-7)
- 1188 Sohmen, D., Chiba, S., Shimokawa-Chiba, N., Innis, C. A., Berninghausen, O., Beckmann, R.,  
1189 Ito, K., & Wilson, D. N. (2015). Structure of the Bacillus subtilis 70S ribosome reveals the  
1190 basis for species-specific stalling. *Nature Communications*, 6, 1–10.  
1191 <https://doi.org/10.1038/ncomms7941>
- 1192 Spahn, C. M. T., Penczek, P. A., Leith, A., & Frank, J. (2000). A method for differentiating  
1193 proteins from nucleic acids in intermediate-resolution density maps: Cryo-electron  
1194 microscopy defines the quaternary structure of the Escherichia coli 70S ribosome.  
1195 *Structure*, 8(9), 937–948. [https://doi.org/10.1016/S0969-2126\(00\)00185-4](https://doi.org/10.1016/S0969-2126(00)00185-4)
- 1196 Stewart, A., & Grigorieff, N. (2004). Noise bias in the refinement of structures derived from  
1197 single particles. *Ultramicroscopy*, 102(1), 67–84.  
1198 <https://doi.org/10.1016/j.ultramic.2004.08.008>

- 1199 Strunk, K. M., Wang, K., Ke, D., Gray, J. L., & Zhang, P. (2012). Thinning of large mammalian  
1200 cells for cryo-tem characterization by cryo-fib milling. *Journal of Microscopy*, 247(3), 220–  
1201 227. <https://doi.org/10.1111/j.1365-2818.2012.03635.x>
- 1202 Subramaniam, S. (2013). Structure of trimeric HIV-1 envelope glycoproteins. *PNAS*, 110(45),  
1203 4172–4174. <https://doi.org/10.1073/pnas.1313802110>
- 1204 Tang, G., Peng, L., Baldwin, P. R., Mann, D. S., Jiang, W., Rees, I., & Ludtke, S. J. (2007).  
1205 EMAN2 : An extensible image processing suite for electron microscopy. *Journal of*  
1206 *Structural Biology*, 157, 38–46. <https://doi.org/10.1016/j.jsb.2006.05.009>
- 1207 Tegunov, D., Xue, L., Dienemann, C., Cramer, P., & Mahamid, J. (2021). Multi-particle cryo-  
1208 EM refinement with M visualizes ribosome-antibiotic complex at 3.5 Å in cells. *Nature*  
1209 *Methods*, 18(2), 186–193. <https://doi.org/10.1038/s41592-020-01054-7>
- 1210 Tichelaar, W., Hagen, W. J. H., Gorelik, T. E., Xue, L., & Mahamid, J. (2020). TEM bright field  
1211 imaging of thick specimens: nodes in Thon ring patterns. *Ultramicroscopy*, 216(November  
1212 2019), 113023. <https://doi.org/10.1016/j.ultramic.2020.113023>
- 1213 Van Heel, M. (2013). Finding trimeric HIV-1 envelope glycoproteins in random noise. *PNAS*,  
1214 110(45), 4175–4177. <https://doi.org/10.1073/pnas.1314353110>
- 1215 Voortman, L. M., Vulović, M., Maletta, M., Voigt, A., Franken, E. M., Simonetti, A., Peters, P.  
1216 J., van Vliet, L. J., & Rieger, B. (2014). Quantifying resolution limiting factors in  
1217 subtomogram averaged cryo-electron tomography using simulations. *Journal of Structural*  
1218 *Biology*, 187(2), 103–111. <https://doi.org/10.1016/j.jsb.2014.06.007>
- 1219 Wan, W., & Briggs, J. A. G. (2016). Cryo-Electron Tomography and Subtomogram Averaging.  
1220 In *The Resolution Revolution: Recent Advances In cryoEM* (1st ed., Vol. 579). Elsevier Inc.  
1221 <https://doi.org/10.1016/bs.mie.2016.04.014>
- 1222 Winkler, H., Zhu, P., Liu, J., Ye, F., Roux, K. H., & Taylor, K. A. (2009). Tomographic  
1223 subvolume alignment and subvolume classification applied to myosin V and SIV envelope  
1224 spikes. *Journal of Structural Biology*, 165(2), 64–77.  
1225 <https://doi.org/10.1016/j.jsb.2008.10.004>
- 1226 Zhang, P. (2019). Advances in cryo-electron tomography and subtomogram averaging and  
1227 classification. *Current Opinion in Structural Biology*, 58, 249–258.  
1228 <https://doi.org/10.1016/j.sbi.2019.05.021>
- 1229 Zivanov, J., Nakane, T., Forsberg, B. O., Kimanius, D., Hagen, W. J. H., Lindahl, E., & Scheres,  
1230 S. H. W. (2018). New tools for automated high-resolution cryo-EM structure determination  
1231 in RELION-3. *ELife*, 7, 1–22. <https://doi.org/10.7554/eLife.42166>

1232

(a)

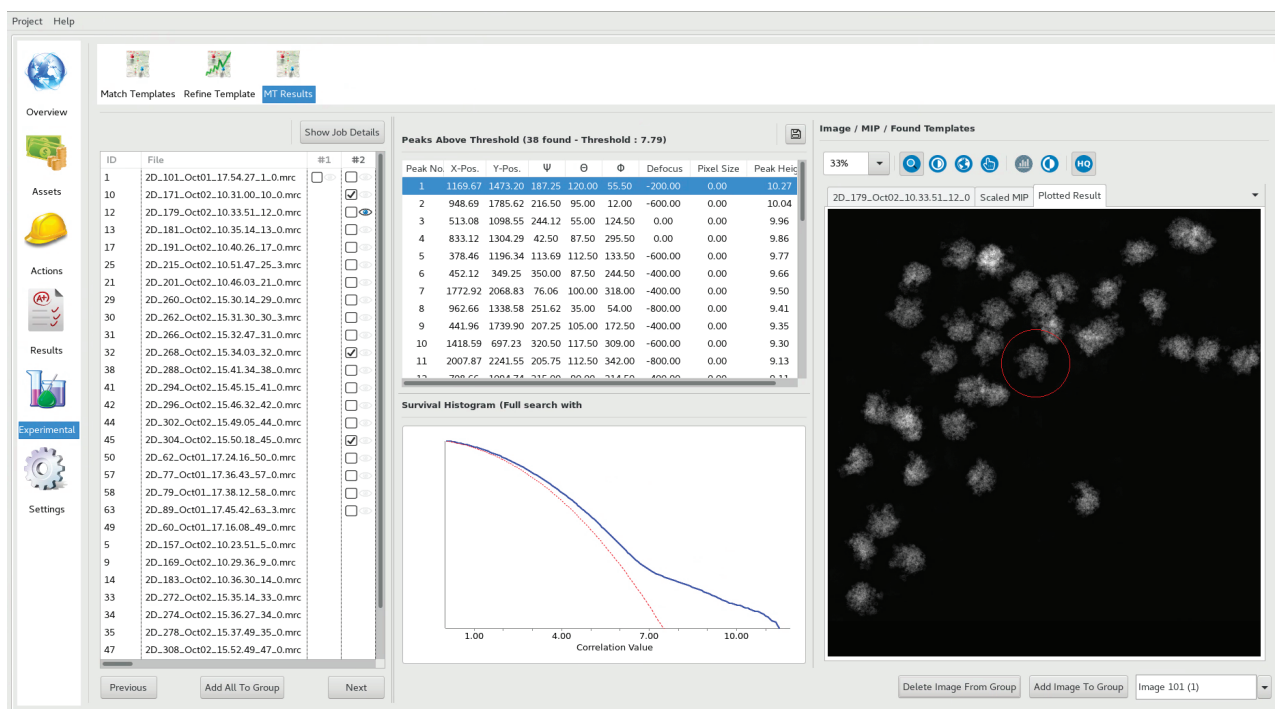

(b)

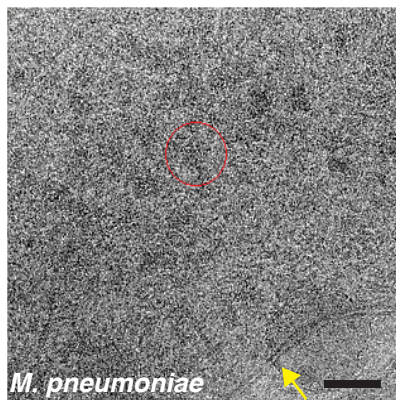

(c)

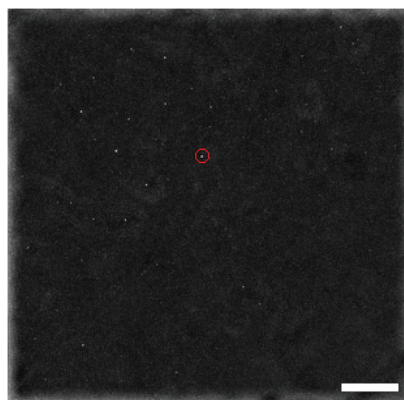

(d)

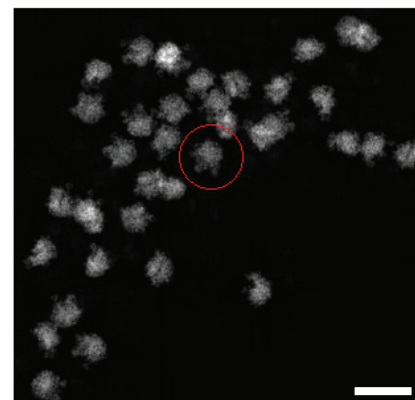

## Figure 1: SI

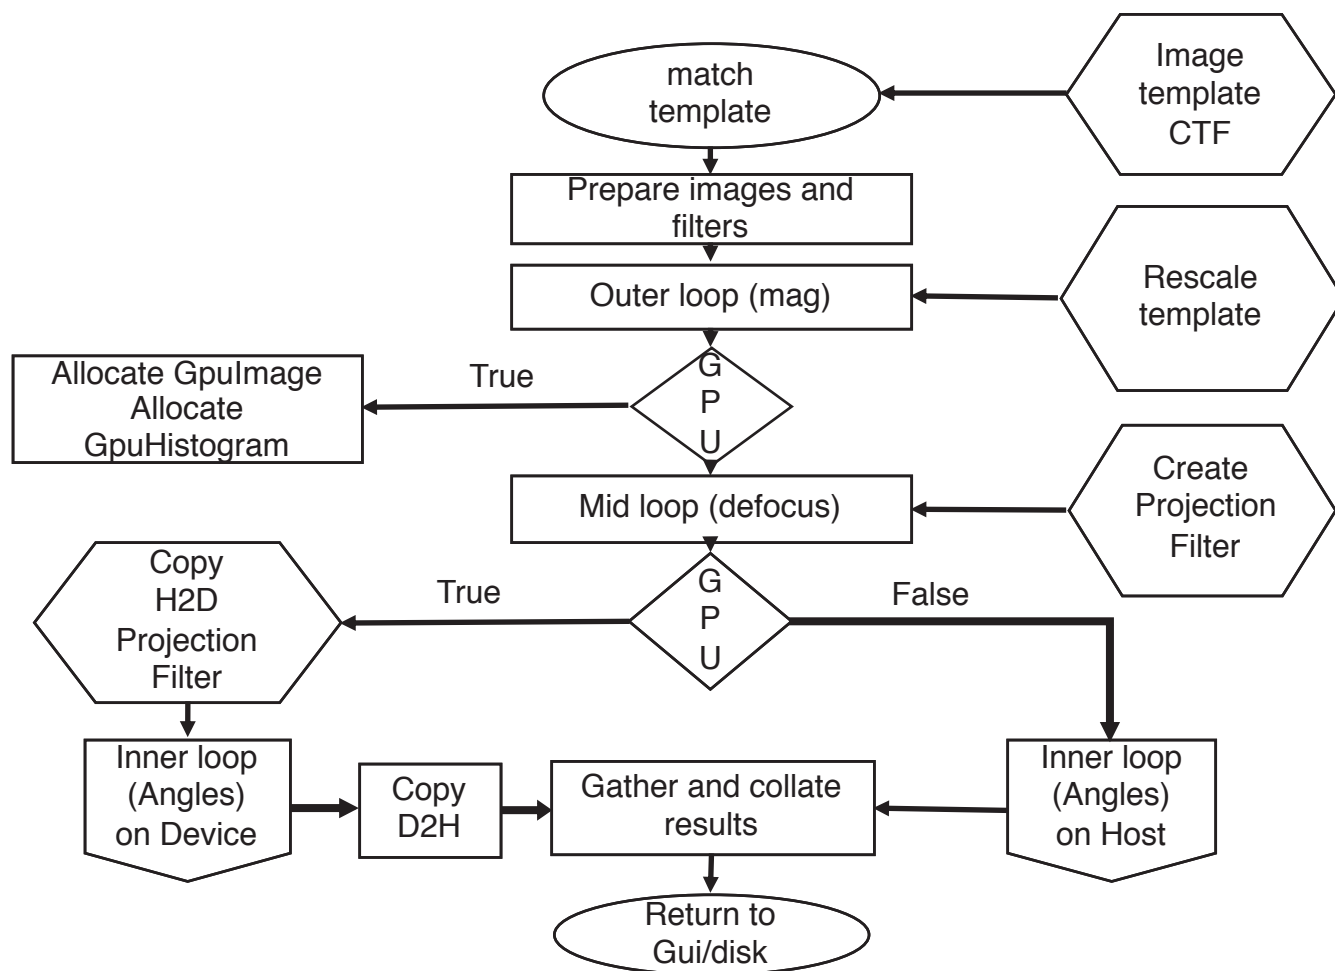

## Figure 2

(a)

MPI like  
angular  
groups

$SO(3)$

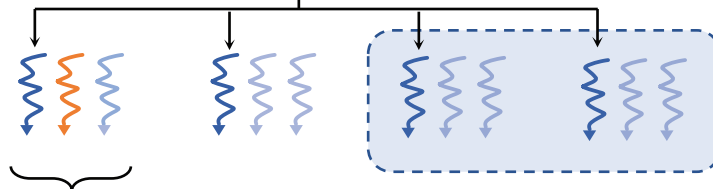

(b)

CUDA streams

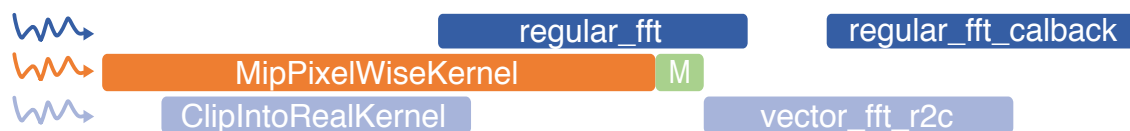

(c)

Computational  
efficiency

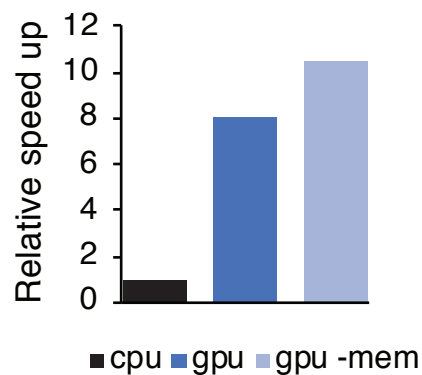

(d)

Scalability

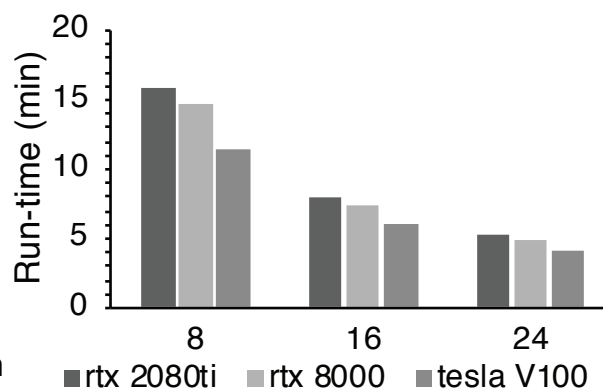

## Figure 2: S1

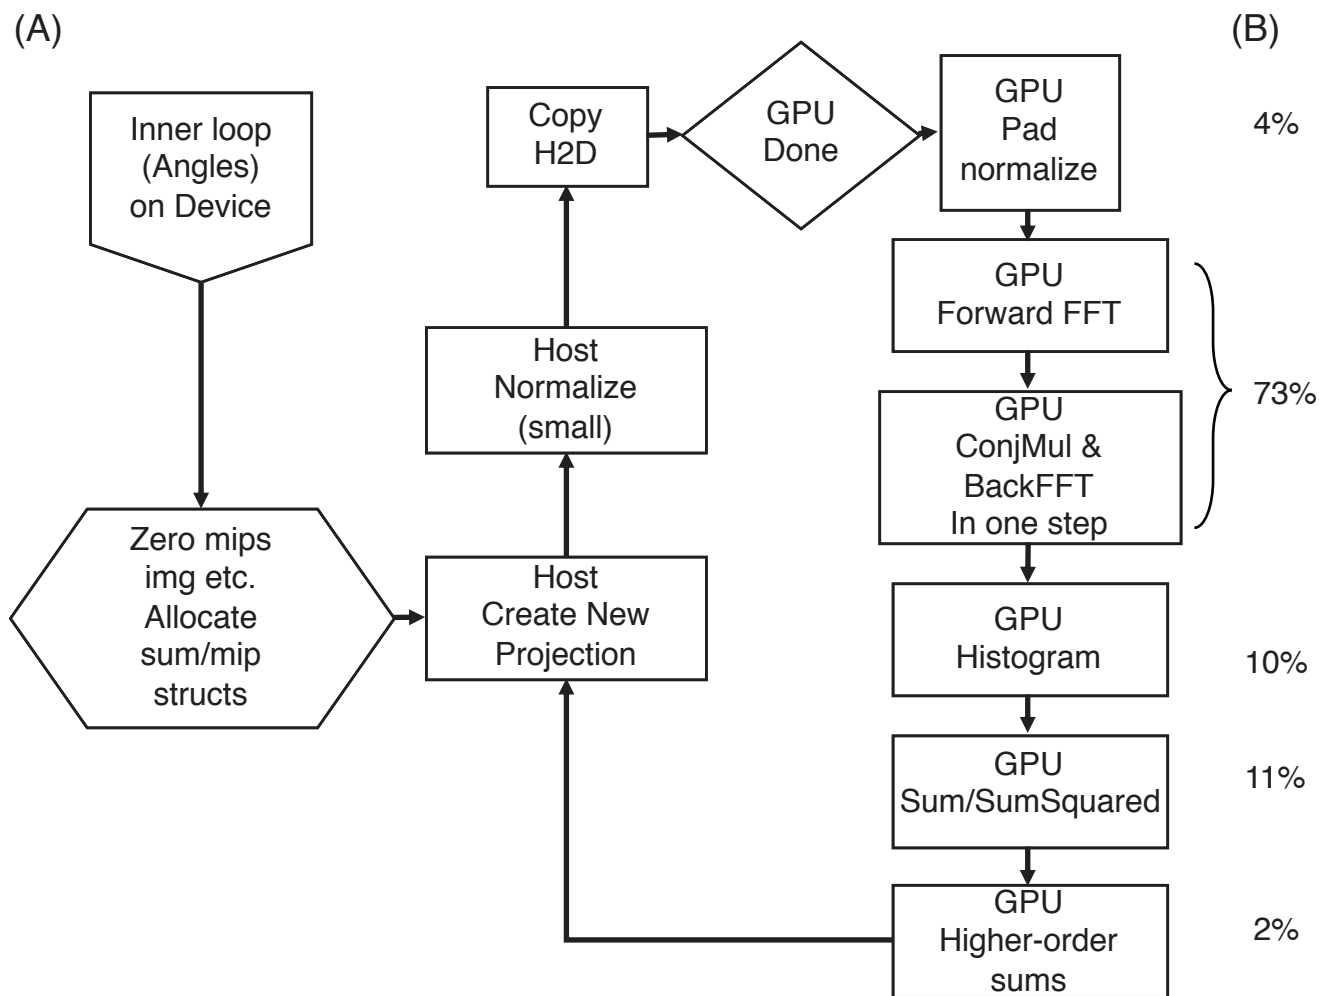

## Figure 3

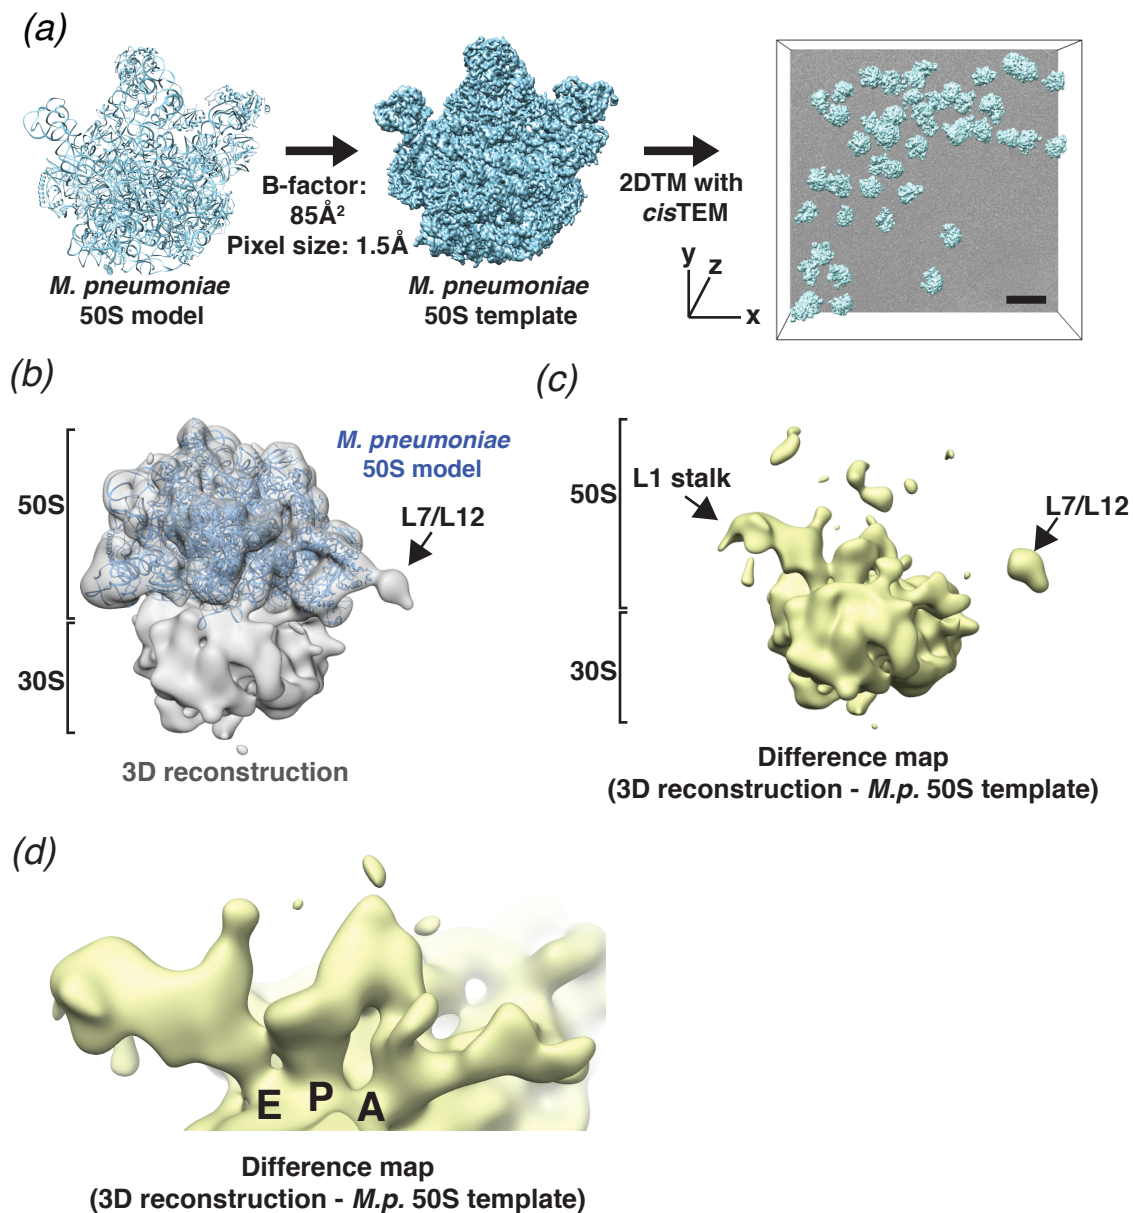



## Figure 3: S1

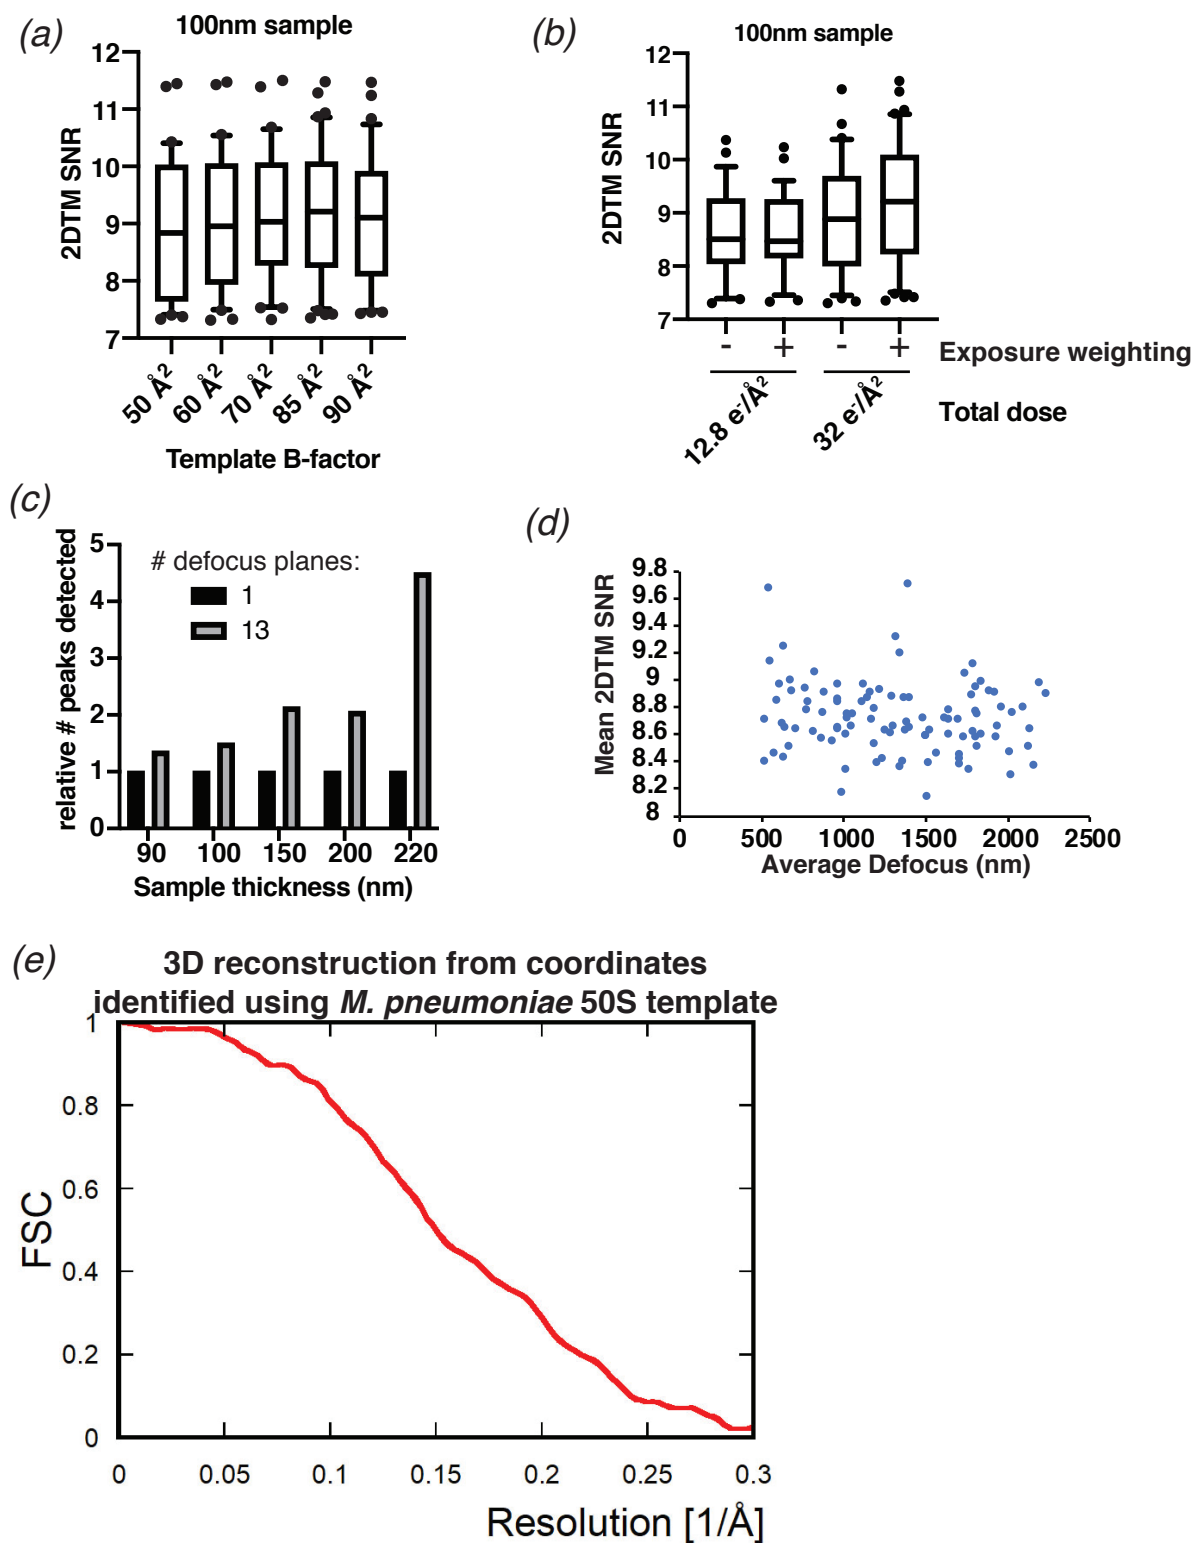

## Figure 4

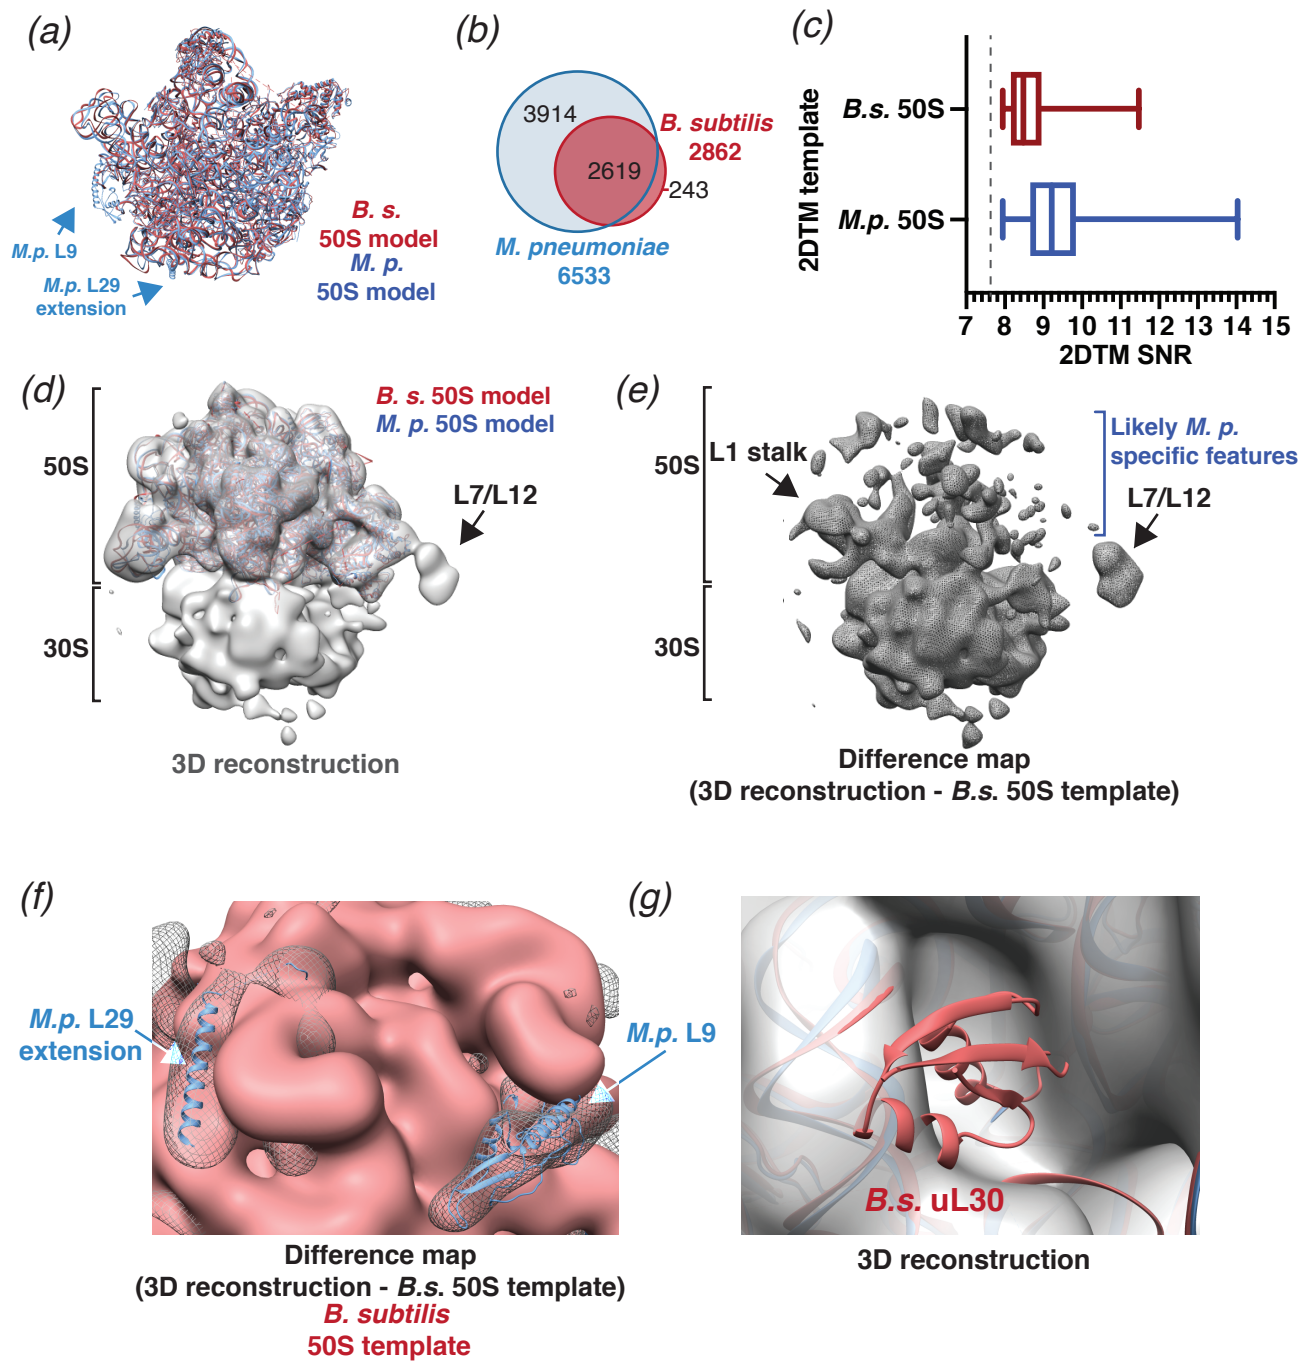

## Figure 4: S1

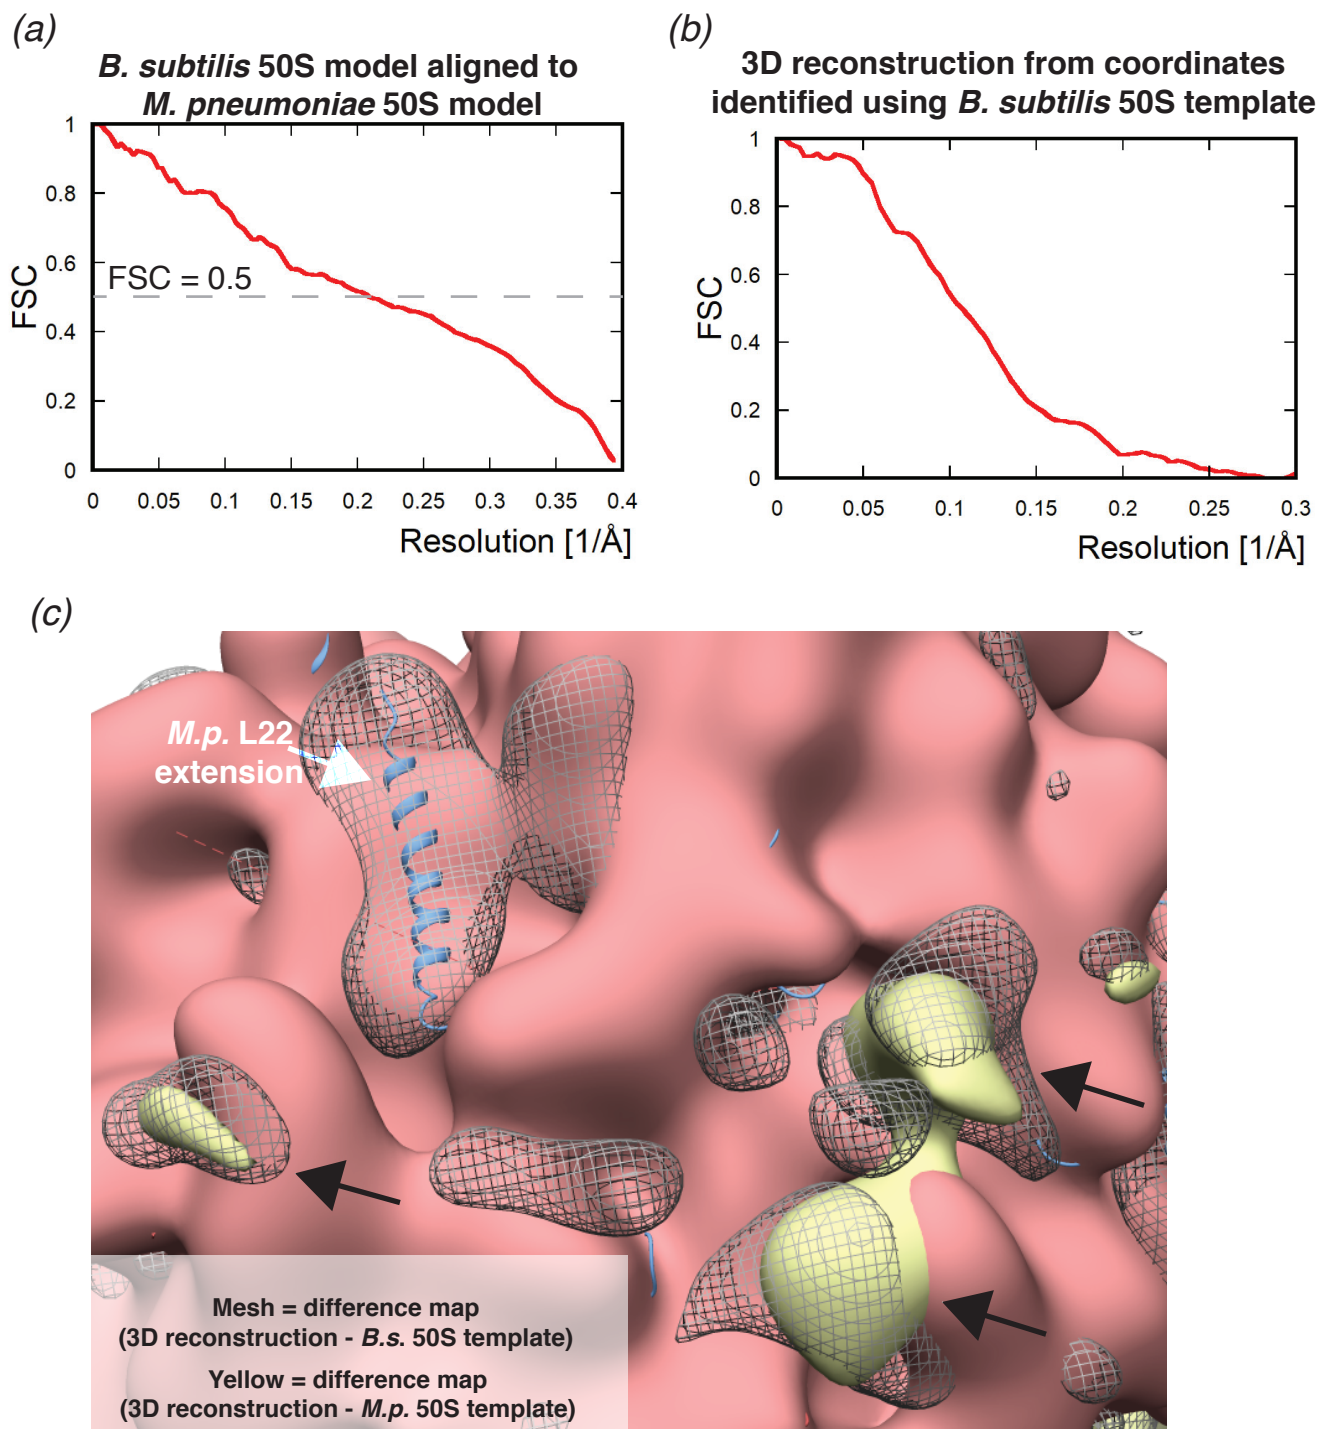

## Figure 5

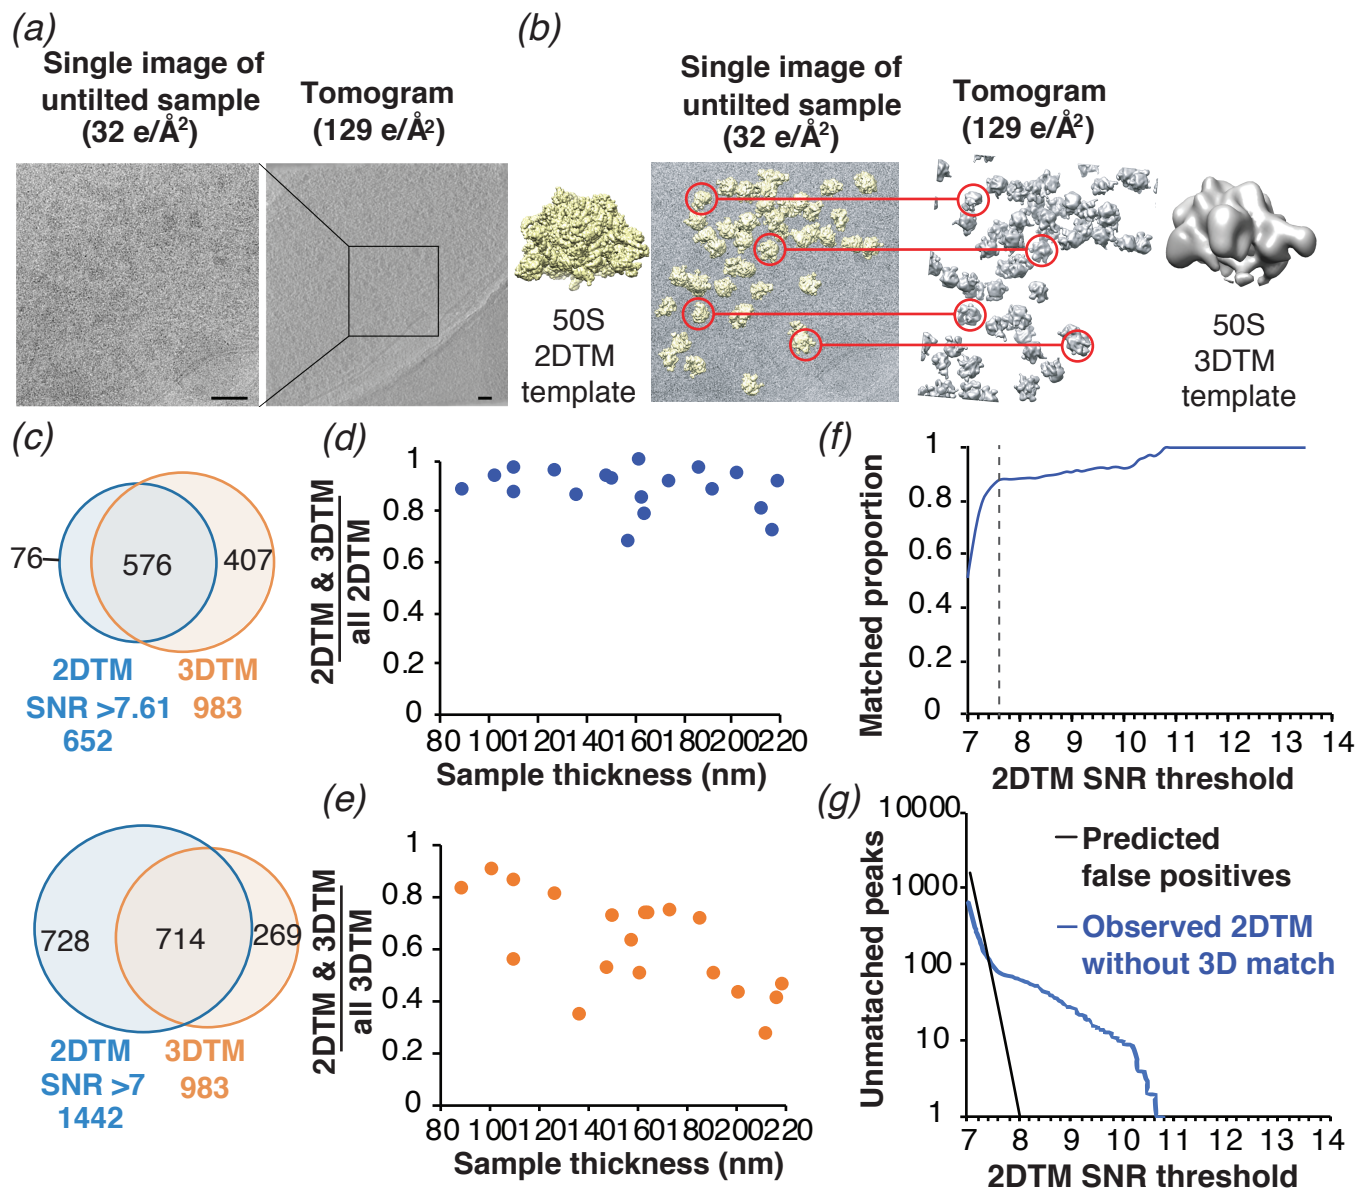

## Figure 5. S1

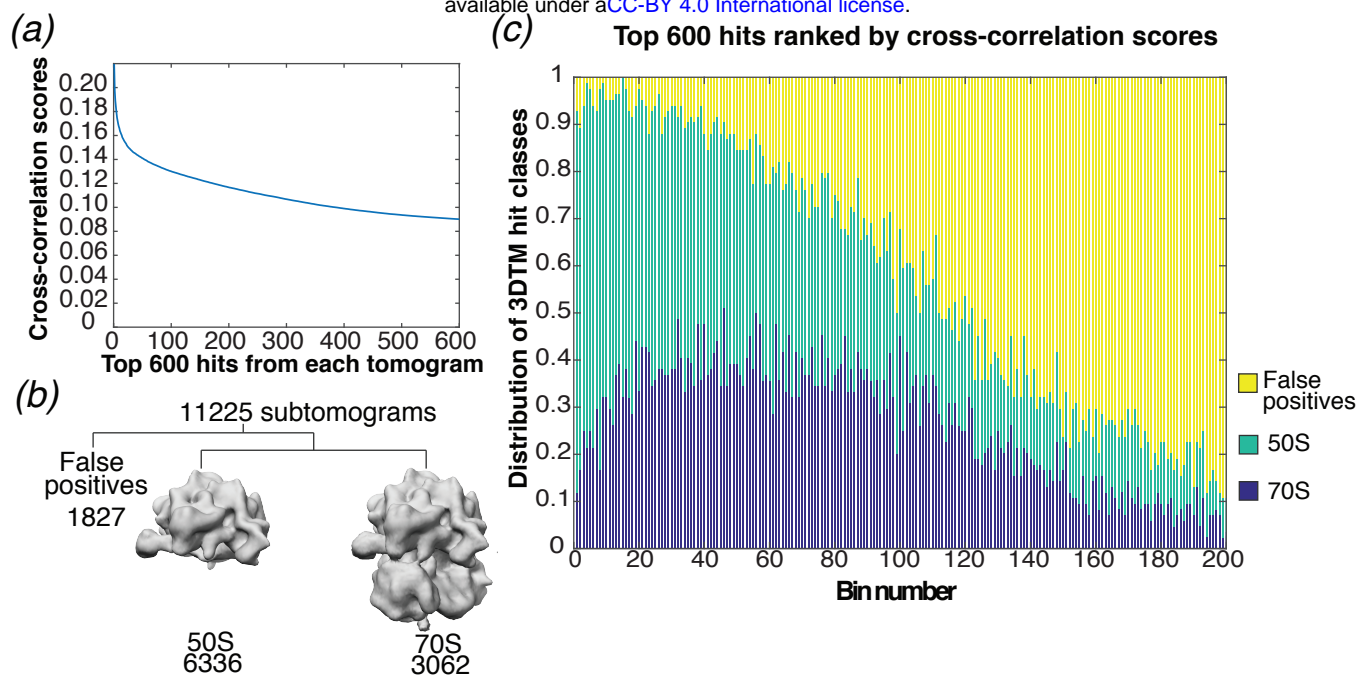

## Figure 5, S2

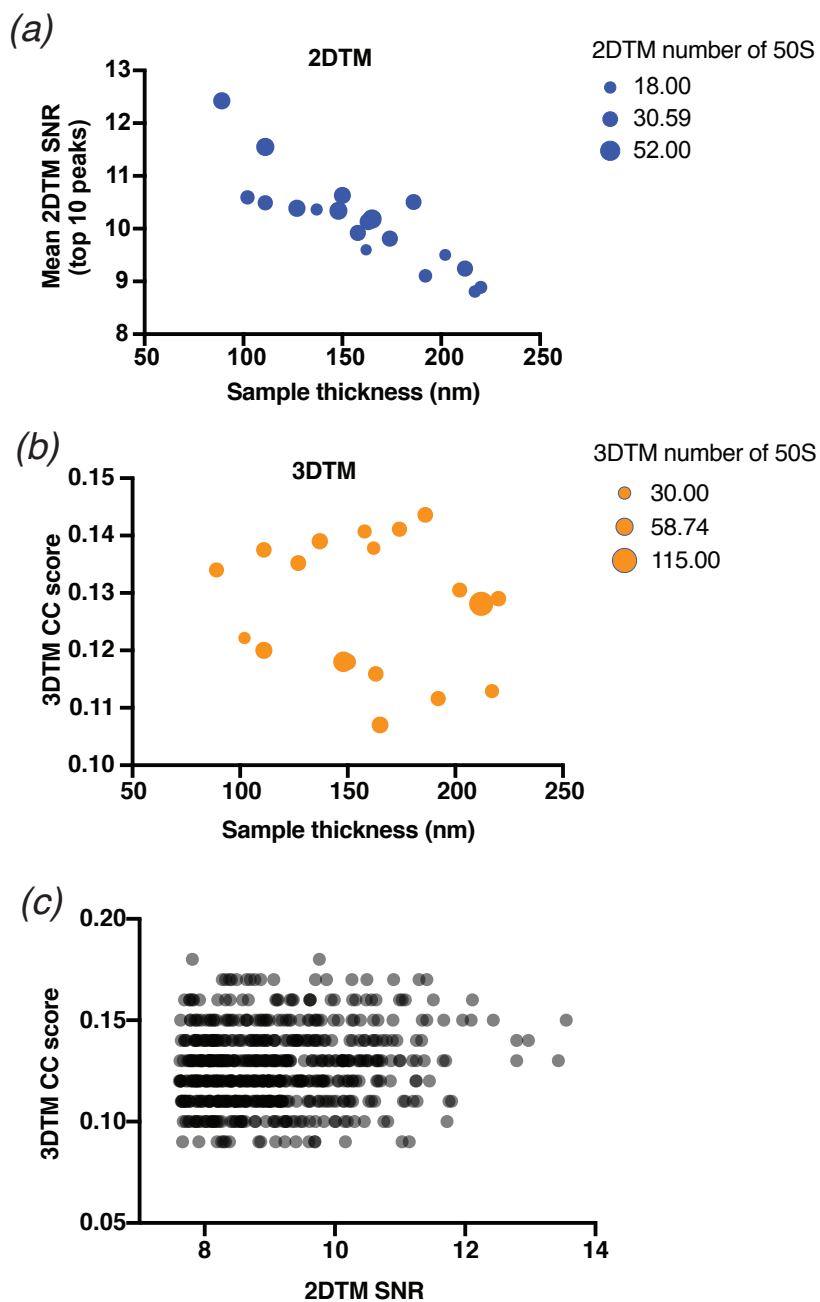

## Figure 6

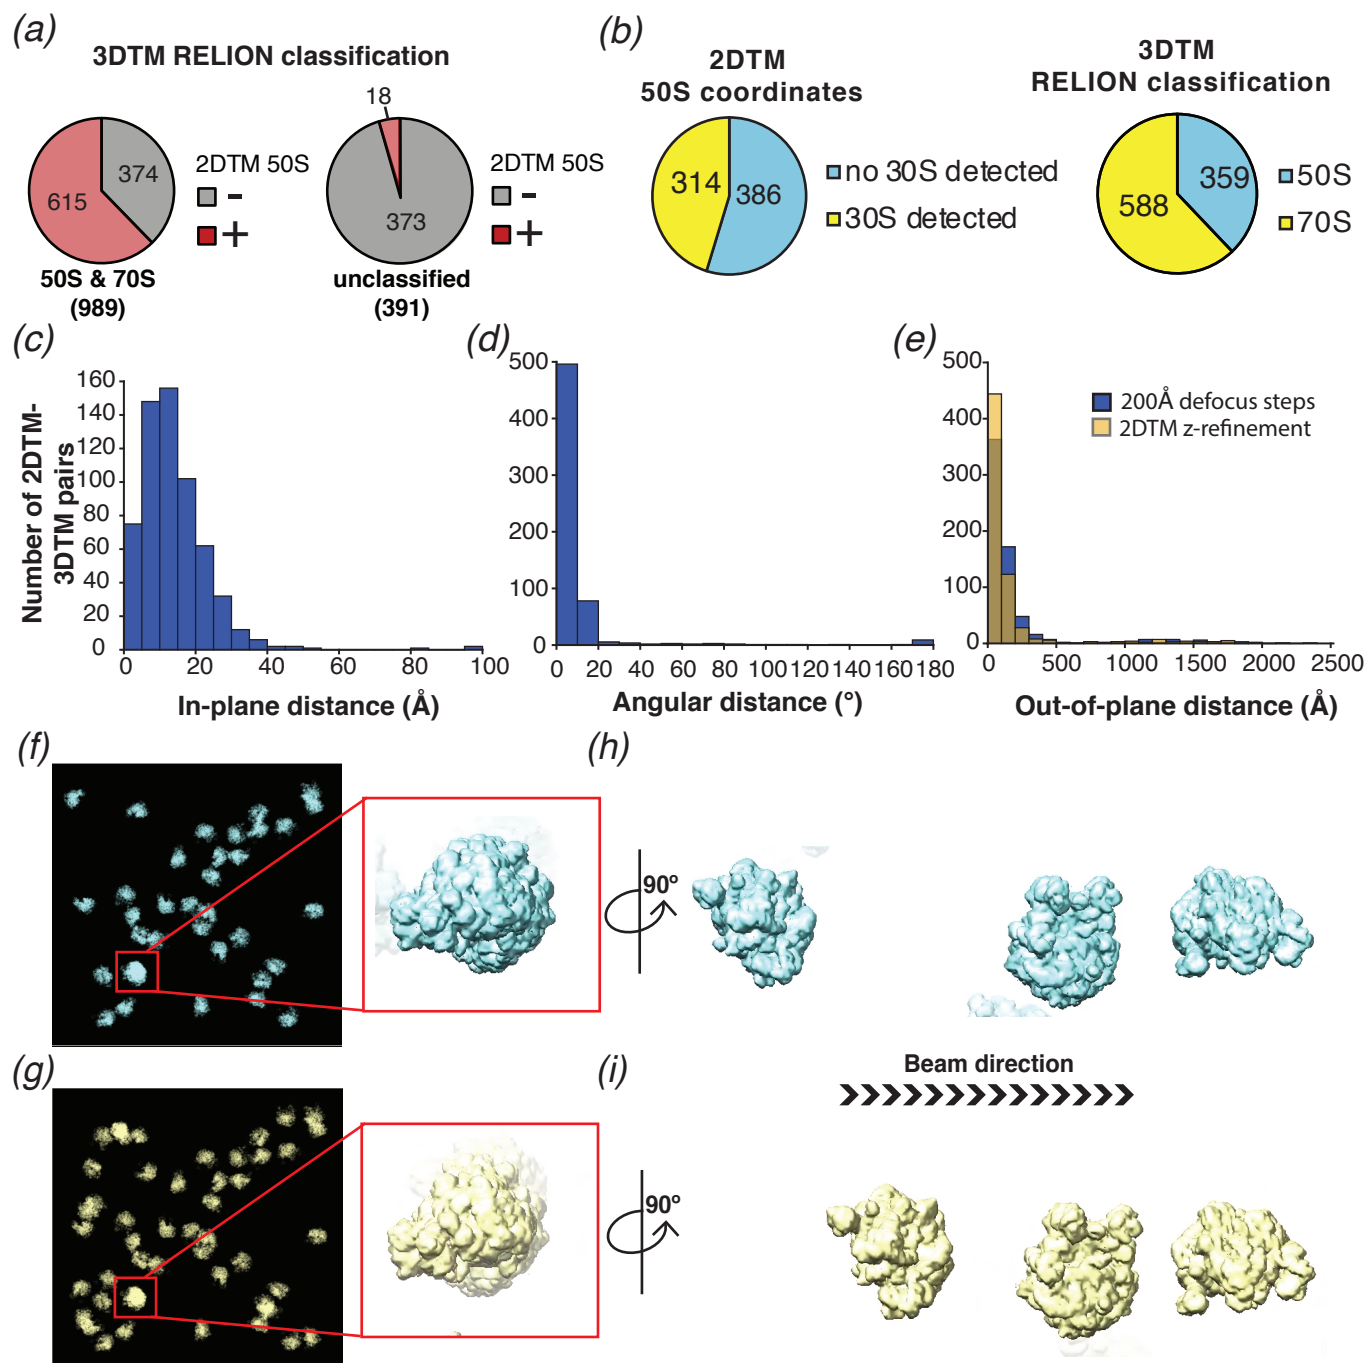

## Figure S6: S1

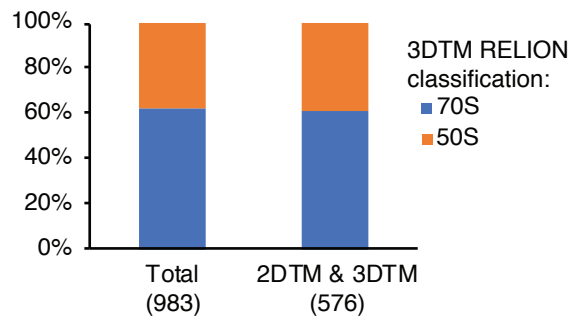

Source: https://www.biorxiv.org/content/10.1101/2021.04.20.440648v1.full.pdf
